1     **A transcriptomics-guided drug target discovery strategy**  
2     **identifies novel receptor ligands for lung regeneration**

3  
4     Xinhui Wu<sup>1,2</sup>, I. Sophie T. Bos<sup>1,2</sup>, Thomas M. Conlon<sup>3</sup>, Meshal Ansari<sup>3</sup>, Vicky  
5     Verschut<sup>1,6</sup> Lars A. Verkleij<sup>1,2</sup>, Angela D'Ambrosi<sup>1,2</sup>, Aleksey Matveyenko<sup>4</sup>, Herbert B.  
6     Schiller<sup>3</sup>, Melanie Königshoff<sup>5</sup>, Martina Schmidt<sup>1,2</sup>, Loes E. M. Kistemaker<sup>1,2,6</sup>, Ali  
7     Önder Yildirim<sup>3</sup>, Reinoud Gosens<sup>1,2,\*</sup>

8  
9     <sup>1</sup>*Department of Molecular Pharmacology, Faculty of Science and Engineering, University of Groningen,*  
10     *Antonius Deusinglaan 1, 9713AV, Groningen, The Netherlands,* <sup>2</sup>*Groningen Research Institute for*  
11     *Asthma and COPD, University Medical Center Groningen, University of Groningen, Groningen, The*  
12     *Netherlands,* <sup>3</sup>*Institute of Lung Biology and Disease (ILBD)/Comprehensive Pneumology Center (CPC),*  
13     *Helmholz Zentrum München, Munich, Germany, Member of the German Center for Lung Research*  
14     *(DZL),* <sup>4</sup>*Department of Physiology and Biomedical Engineering, Mayo Clinic Collage of Medicine,*  
15     *Rochester, Minnesota, USA,* <sup>5</sup>*University of Pittsburg,* <sup>6</sup>*Aquilo BV, Groningen, The Netherlands,*  
16     \*Correspondence

17  
18

19 **Abstract**

20 Currently, there is no pharmacological treatment targeting defective tissue repair in  
21 chronic disease. Here we utilized a transcriptomics-guided drug target discovery  
22 strategy using gene signatures of smoking-associated chronic obstructive pulmonary  
23 disease (COPD) and from mice chronically exposed to cigarette smoke, identifying  
24 druggable targets expressed in alveolar epithelial progenitors of which we screened  
25 the function in lung organoids. We found several drug targets with regenerative  
26 potential of which EP and IP prostanoid receptor ligands had the most significant  
27 therapeutic potential in restoring cigarette smoke-induced defects in alveolar epithelial  
28 progenitors *in vitro* and *in vivo*. Mechanistically, we discovered by using scRNA-  
29 sequencing analysis that circadian clock and cell cycle/apoptosis signaling pathways  
30 were enriched in alveolar epithelial progenitor cells in COPD patients and in a relevant  
31 model of COPD, which was prevented by PGE2 or PGI2 mimetics. Conclusively,  
32 specific targeting of EP and IP receptors offers therapeutic potential for injury to repair  
33 in COPD.

34

35 **Key words:** PGE2; PGI2; repair; cell cycle; circadian clock signaling; drug screening

36

37

38

## 39 **Introduction**

40 One of the main challenges in pharmacology today is the generation of drugs with  
41 regenerative potential, with the ability to restore tissue repair in chronic disease.  
42 Regenerative medicine has thus far mainly focused on transplantation, tissue  
43 engineering approaches, stem- or progenitor cell therapy, or a combination of these<sup>1</sup>.  
44 A regenerative pharmacological approach will have considerable additional potential  
45 because it can be applied on a relatively large scale. Furthermore, it can be used to  
46 halt the disease process in an early stage resulting in real disease-modifying treatment.  
47 Also, pharmacological targeting may aid or support other regenerative strategies.

48 There is a need for regenerative pharmacology in respiratory, cardiovascular, and  
49 neurological diseases as well as many other disease areas. In respiratory medicine,  
50 chronic obstructive pulmonary disease (COPD) is one of the most common lung  
51 diseases with a need for regenerative therapies. The disease is characterized by  
52 airflow limitation that is not fully reversible, and which deteriorates progressively. The  
53 main difficulty underlying COPD pathogenesis is increased tissue destruction in  
54 combination with abnormal tissue repair in susceptible individuals. As current  
55 therapies do not modify the course of the disease, developing new therapeutic  
56 strategies aiming at regeneration of tissue is necessary.

57 In affected individuals, there is an increase in alveolar air space associated with  
58 destruction of alveolar epithelial cells along with reduced capacity of epithelial  
59 progenitors to restore this defect. In the distal lung, alveolar type II cells and alveolar  
60 epithelial progenitors harbour stem cell capacity and function to maintain alveolar  
61 epithelium<sup>2</sup>. These cells reside in a local tissue microenvironment called the niche,  
62 which is composed of supporting cells such as fibroblasts and alveolar macrophages.  
63 The niche controls adequate activation of the progenitor cell<sup>1-3</sup> by means of secreted

64 factors such as WNTs, FGFs, retinoic acid, and many other factors that control  
65 stemness, proliferation and differentiation<sup>3</sup>.

66 Like in many chronic diseases associated with ageing, this local lung  
67 microenvironment is insufficiently supportive for lung repair in COPD<sup>1,4,5</sup>. For example,  
68 studies have indicated that an imbalance of canonical and noncanonical WNT  
69 signaling results in impaired alveolar regeneration in COPD<sup>4,6</sup>. Moreover, lymphotoxin-  
70  $\beta$  (LT $\beta$ ), released from CD8<sup>+</sup> T-cells in COPD, can negatively interfere with repair.  
71 LT $\beta$  induces noncanonical NF $\kappa$ B signalling, thereby repressing functional Wnt/ $\beta$ -  
72 catenin signalling in the lung<sup>5</sup>. Accordingly, the challenge towards successful  
73 regenerative pharmacology in COPD needs to take into consideration the specific  
74 hostile microenvironment and the abnormal repair process that stands in the way of  
75 adequate regeneration in COPD.

76 In the present study, we hypothesized that a transcriptomics guided drug target  
77 discovery strategy based on gene signatures differentially expressed in COPD and in  
78 response to cigarette smoke may be used to identify novel druggable gene targets  
79 that are specifically involved in defective lung repair in COPD. Our results show that  
80 such a strategy coupled to functional studies in organoids yields novel receptor ligands  
81 of which EP and IP prostanoid receptor had the most significant potential in  
82 counteracting the negative effects of cigarette smoke on alveolar progenitor cell  
83 function.

## 84 **Results**

85 **Transcriptomics-guided screening to identify novel targets.** We set out to identify  
86 novel drug targets that may help restore defective lung repair. To achieve this, we  
87 utilized a transcriptomics-guided target discovery strategy (described in Fig. 1a) based  
88 on gene signatures of COPD lung tissues<sup>7</sup> and of a relevant model of cigarette smoke

89 exposure<sup>8</sup> to identify differentially regulated druggable genes. We found Reactome  
 90 pathways related to inflammation such as *Neutrophil degranulation* and *Innate*  
 91 *immune system* as well as pathways related to the extracellular matrix such as  
 92 *Extracellular matrix organization* and *Integrin cell surface interactions* to be enriched  
 93 in both datasets (Fig. 1b-e). We identified 38 individual target genes that were  
 94 concordantly up- and 30 individual target genes concordantly downregulated. These  
 95 genes were filtered through the ‘Drug-gene interactions and potential druggability in  
 96 the drug gene interaction database’ (DGIdb, <http://www.dgidb.org/>), which rendered  
 97 25 druggable upregulated genes and 16 druggable downregulated genes (Fig. 1f).  
 98 Genes were further filtered for expression in lung epithelial cells or fibroblasts by  
 99 consulting the human lung cell atlas (<https://asthma.cellgeni.sanger.ac.uk/>) and lung  
 100 map (<https://lungmap.net/>), which yielded 15 druggable target genes.

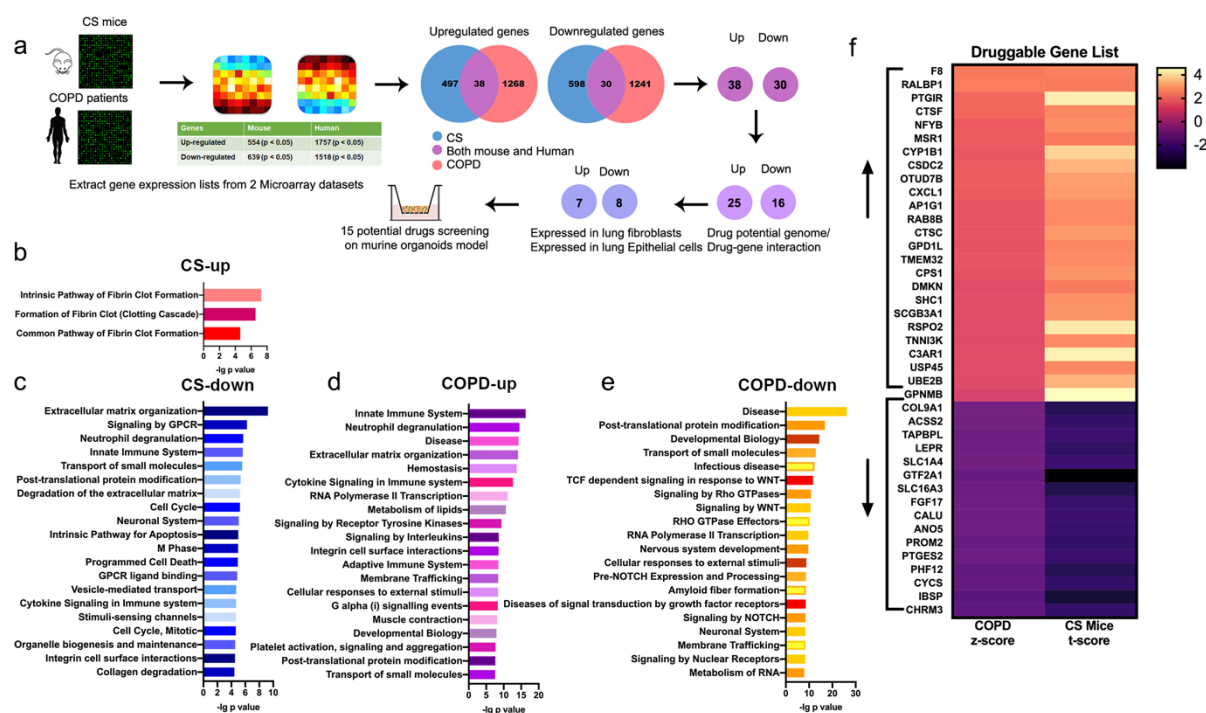

101  
 102 **Figure 1 Overview of the transcriptomics-guided drug discovery strategy.** **a** Schematic outline of  
 103 the drug screening strategy. **b-c** Reactome pathway enrichment analysis of differentially up- and  
 104 downregulated genes from CS-exposed mice<sup>8</sup> using GSEA (<https://www.gsea->  
 105 [msigdb.org/gsea/msigdb/annotate.jsp](https://www.gsea-msigdb.org/gsea/msigdb/annotate.jsp)). **d-e** Reactome pathway enrichment analysis of up- and

106 downregulated genes from COPD patients<sup>7</sup> using GSEA, the top 20 pathways enriched are presented.  
107 **f** Heatmap shows the gene expression pattern of the druggable genes (<http://www.dgidb.org/>) identified  
108 both in CS-exposed mice and COPD patient databases.

109 To assess the potential relevance of signaling functionally associated with the 15  
110 genes of interest, we set up an *in vitro* organoid model to perform specific drug  
111 screening tests. We co-cultured human and mouse CD31-/CD45-/ EpCAM<sup>+</sup> lung  
112 epithelial cells with CCL206 lung fibroblasts in organoids in Matrigel and exposed  
113 these *in vitro* to different concentrations (1.25%, 2.5%, 5%) of cigarette smoke extract  
114 (CSE) (Fig. 2a, c). The number and size of organoids established by co-culturing  
115 human lung tissue derived CD31-/CD45-/EpCAM<sup>+</sup> cells and MRC5 fibroblasts was  
116 significantly decreased by CSE in a concentration dependent manner at day 14 (Fig.  
117 2b). The total number of murine organoids quantified at day 14 of treatment with  
118 different concentrations of CSE yielded similar results and was decreased in a CSE  
119 dose dependent manner as well (Fig. 2e). To specifically analyze the impact of CSE  
120 on organoids derived from alveolar epithelial progenitors, we morphologically  
121 subclassified organoids into airway and alveolar type<sup>9</sup> organoids (Fig. 2d), which  
122 revealed that alveolar organoid numbers were more susceptible to cigarette smoke  
123 extract exposure than airway organoids (Fig. 2e). Immunofluorescence (IF) studies  
124 confirmed that the number of acetylated- $\alpha$  tubulin<sup>+</sup> (ACT; ciliated cell marker, airway  
125 type organoids) and pro-SPC<sup>+</sup> (type II cell marker, alveolar type organoids) organoids  
126 was significantly decreased by 5% CSE (Fig. 2f). The size of both organoid types was  
127 decreased at day 14 (Fig. 2g).

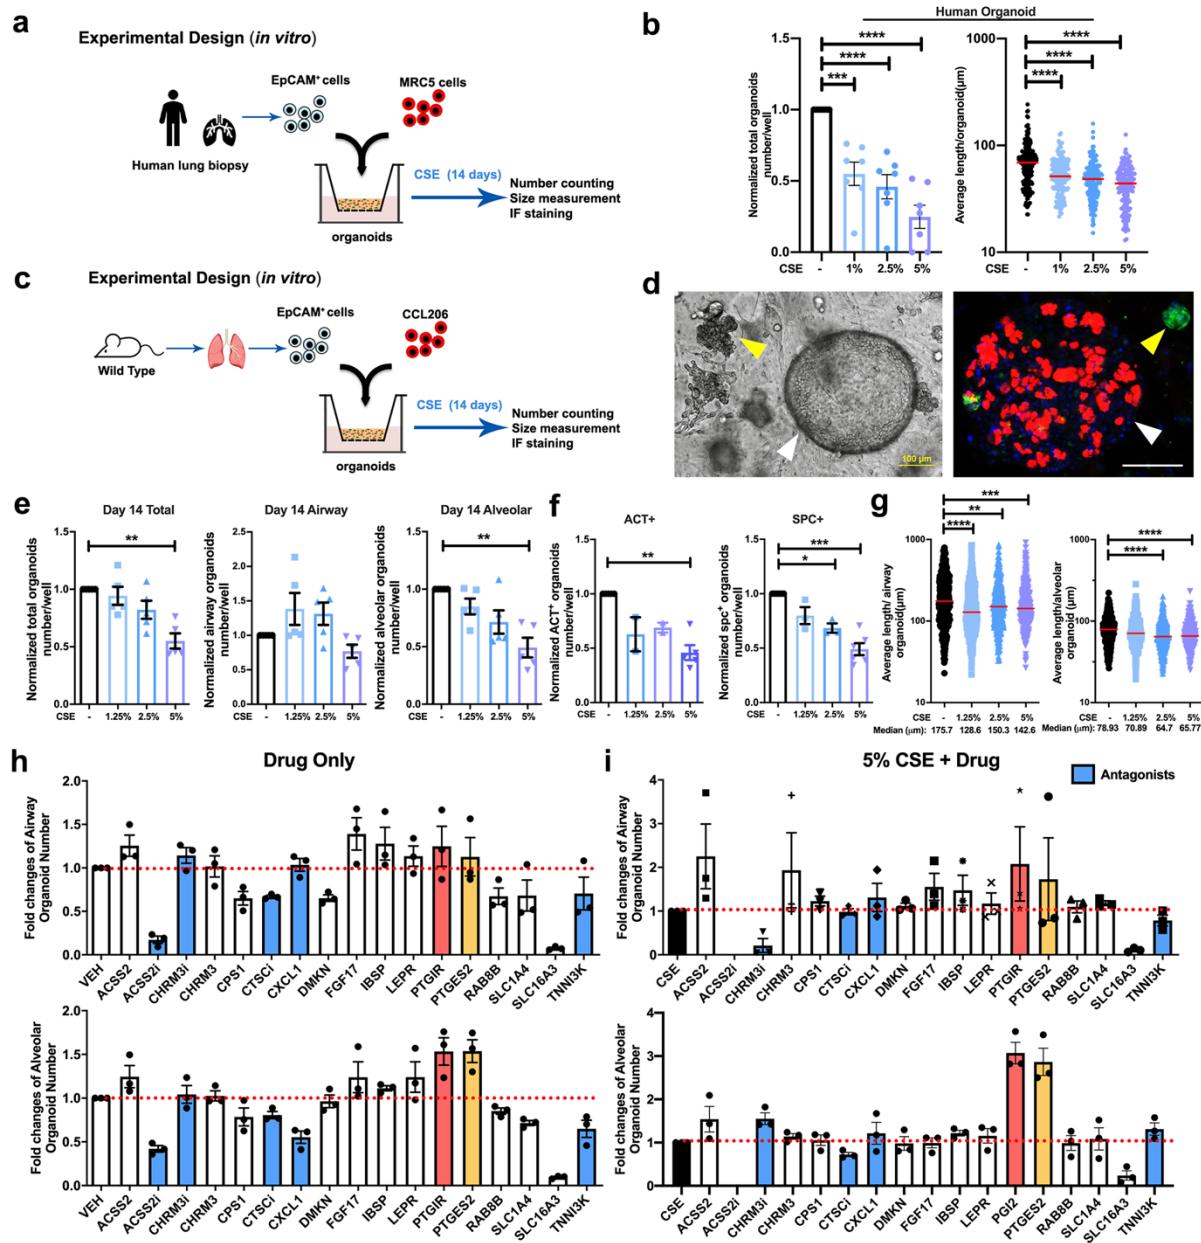

128

129 **Figure 2. Cigarette smoke exposure represses adult epithelial lung organoid formation. a**

130 Schematic of *in vitro* human experimental design. **b** Quantification of total amount of human organoids

131 and the quantification of average human organoid diameters after treatment with cigarette smoke

132 extract (CSE) (0, 1, 2.5, and 5%). N = 7 experiments (2 healthy, 5 COPD donors). n > 150

133 organoids/group. **c** Schematic of *in vitro* murine experimental design. **d** Representative images of

134 murine lung organoids. Left: light microscopy. Right: immunofluorescence of organoids. Green: pro-

135 SPC (SPC), red: acetylated- $\alpha$  tubulin (ACT), blue: DAPI. White arrow: airway type of organoid, yellow

136 arrow: alveolar type of organoid. Scale bar, 100  $\mu$ m. **e** Quantification of the normalized number of total

137 organoids, airway, and alveolar type organoids on day 14 obtained after treatment with different

138 concentrations of CSE (0, 1.25, 2.5, and 5%). **f** Quantification of normalized ACT<sup>+</sup> and pro-SPC<sup>+</sup>  
139 organoids obtained after treatment with 0, 1.25, 2.5, and 5% CSE. **g** Quantification of average organoid  
140 diameter after treatment with 0, 1.25, 2.5, and 5% CSE measured on day 14. N = 5 experiments, n >  
141 380 organoids/group. **h-i** Overview of drug screening using the *in vitro* murine lung organoid model.  
142 Comparison of the normalized number of airway and alveolar type organoids treated with the different  
143 drugs of interest in the absence (**h**) or presence (**i**) of 5% CSE. Red bar: PTGIR, yellow bar: PTGES2,  
144 blue: antagonists. Data are presented as mean ± SEM in number quantification. Data are presented as  
145 scatter plots with medians in size quantification. For all panels: \*\*p < 0.05, \*p < 0.01, \*\*\*p < 0.001, \*\*\*\*p  
146 < 0.0001.

147

148 We next aimed to utilize this lung organoid model to evaluate the efficacy of existing  
149 COPD therapeutics. Increasing evidence<sup>10,11</sup> has linked phosphodiesterase (PDE) 4  
150 inhibition to the therapeutic management of respiratory diseases, and roflumilast has  
151 been used as an oral medication in COPD patients with a prior history of hospitalization  
152 for an acute exacerbation (GOLD 2021). This led us to explore whether the classic  
153 PDE4 inhibitor, rolipram, was able to rescue the CS-induced reduction in organoid  
154 formation by alveolar progenitors. Thus, organoids were subjected *in vitro* to different  
155 concentrations (1 and 10 μM) of rolipram in the presence and absence of 5% CSE for  
156 up to 14 days (Fig.S1a). Rolipram (10 μM) alone significantly increased the total  
157 number of organoids at day 7 as well as the pro-SPC<sup>+</sup> organoids at day 14 (Fig.S1b,  
158 c), but had no beneficial effects on organoid numbers when combined with CSE  
159 exposures. Treatment with rolipram (1 μM) either alone or in combination with CSE  
160 induced significantly increase alveolar organoid size (Fig.S1d).

161 Budesonide is an inhaled corticosteroid used in COPD management<sup>12-15</sup>. Therefore,  
162 we examined its effect also in our *in vitro* (Fig. S1e) and *in vivo* (Fig. S1h) CS/organoid  
163 models. Intriguingly, budesonide (1-, 10-, 100 nM) in combination with CSE exposure  
164 further reduced the number as well as the size of both airway and alveolar type



165 organoids as compared to CSE exposure alone (Fig. S1f, g). *In vivo* exposure to  
166 budesonide together with CS increased the number of airway but not alveolar  
167 organoids (Fig. S1i), without affecting organoid size (Fig. S1j). Taken together, these  
168 data show that *in vitro* exposure to cigarette smoke extract functionally represses  
169 human alveolar epithelial progenitor organoid formation, resulting in reduced growth  
170 and differentiation, which can be mimicked using murine alveolar epithelial progenitors.  
171 Validating the limitations of current pharmacology, PDE4 inhibitors and corticosteroids  
172 do not prevent or reduce the detrimental effects of cigarette smoke on organoid  
173 formation.

174 The assay was used subsequently to screen for the functionality of the targets in  
175 restoring organoid growth. Genes downregulated in response to CS and COPD were  
176 targeted with activating ligands, whereas genes upregulated in response to CS and  
177 COPD were targeted using antagonists with exception of *ACSS2* and *CHRM3* for  
178 which we included both an agonist and an antagonist. The effects of the drugs  
179 targeting the 15 selected genes alone (compared to vehicle, Fig. 2h) and in the  
180 presence of 5% CSE exposure (Fig. 2i) on the number of organoids were determined.  
181 Specific information of all drug effects on organoid number and size are summarized  
182 in Supplementary figure 2 and 3. Interestingly, the compound activating *ACSS2*  
183 (Acetyl-CoA synthetase short-chain family member 2), increased the number of airway  
184 type organoids and the size of alveolar organoids in combination with CSE (Fig. S2-  
185 3), whereas the *ACSS2* inhibitor had the opposite effects. Atropine (*CHRM3*  
186 antagonist), IBSP (Integrin Binding Sialoprotein) and LEPR (Leptin receptor) tended  
187 to increase the number and size of alveolar organoids in response to CSE as well (Fig.  
188 S2-3). However, considering the overall magnitude of alveolar type organoids  
189 particularly, PGE2 (target gene *PTGES*) and iloprost, (PGI2 analogue, target gene

190 *PTGIR*) were identified as the by far most promising targets with regards to their  
191 capacity in restoring the CSE-induced repression of organoid formation (Fig. 2h-i, S2-  
192 3).

193 **PGE2 and PGI2 significantly prevent alveolar epithelial dysfunction.** The  
194 *PTGES2* and *PTGIR* genes encode membrane-associated prostaglandin E synthase  
195 and the prostacyclin (PGI2) receptor, respectively. PGE2 acts on 4 receptor subtypes,  
196 being *PTGER1-4*, whereas PGI2 acts primarily on *PTGIR*. We assessed their  
197 expression in human lung tissue of healthy smokers and COPD patients and found  
198 maintained expression of all receptors in disease with some small differences in  
199 expression, most notably a reduced expression of *PTGER2* and increased expression  
200 of *PTGIR* (Fig. 3a). Single cell RNAseq (sc-RNAseq) data from human lung tissue  
201 shows similar expression of all 5 receptors was detected in alveolar epithelial cells and  
202 in fibroblasts (<http://www.copdcellatlas.com/>). Single cell RNA sequencing of mouse  
203 lung tissue showing that expression of *Ptger2* and *Ptger4* were highest compared to  
204 that of *Ptger1* and *Ptger3* in mesenchymal cells (Fig. 3b, c). Interestingly, the  
205 expression of *PTGES*, and *PTGES2*, the enzymes responsible for PGE2 synthesis  
206 were relatively ubiquitous in human and mouse lung tissue, whereas *PTGIS*, the  
207 enzyme responsible for PGI2 synthesis was highest in mesenchymal cell types  
208 including fibroblasts. The expression of all these receptors showed lower copy  
209 numbers, which is expected for G protein-coupled receptors (GPCRs).

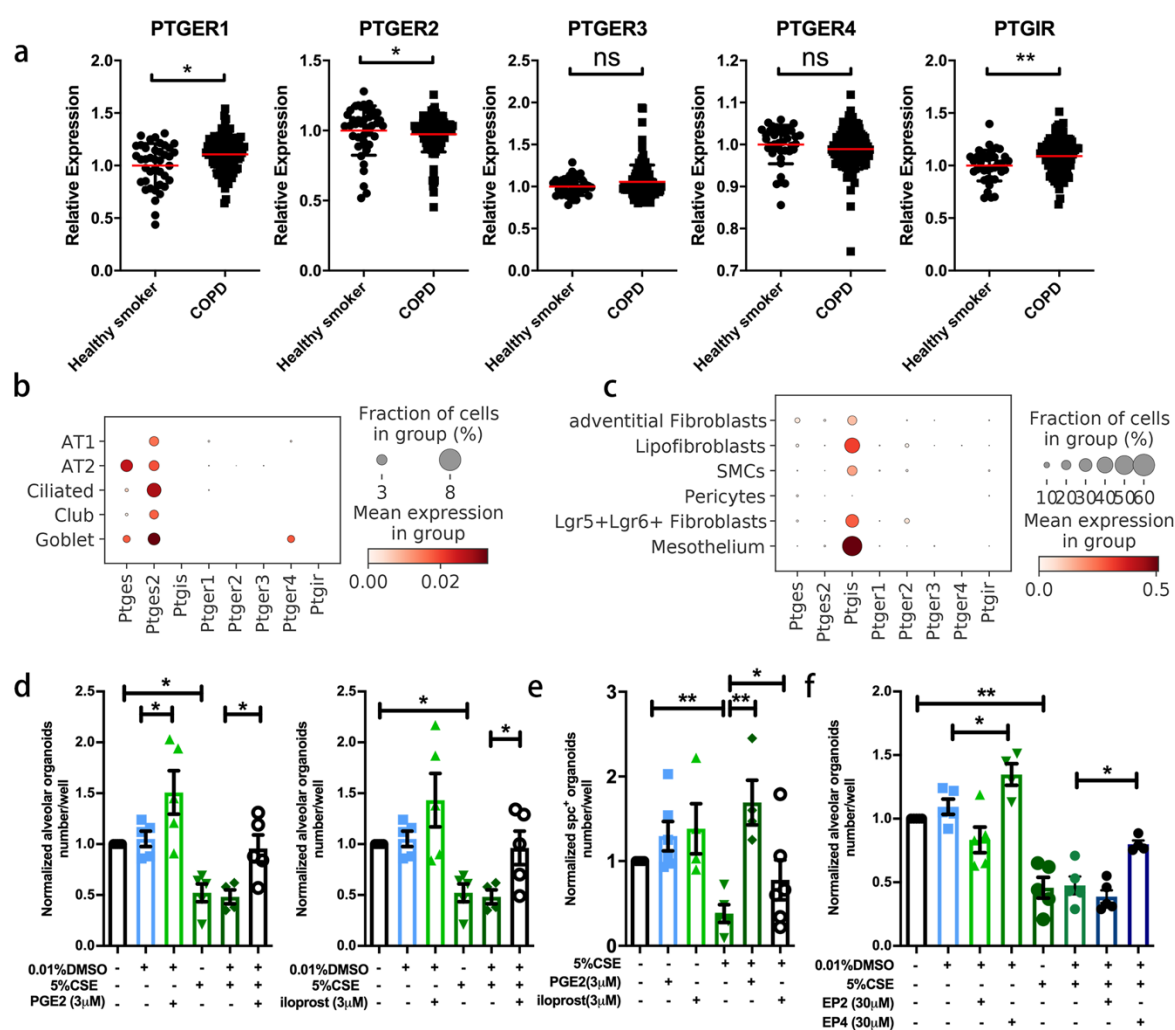

210

211 **Figure 3 16,16-dimethyl prostaglandin E2, iloprost, and selective EP2 and EP4 analogues restore**

212 **lung organoid formation in response to cigarette smoke (extract).** **a** The relative gene expression

213 of *PTGER1*, *PTGER2*, *PTGER3*, *PTGER4* and *PTGIR* in healthy smokers (N = 40) and COPD patients

214 (N = 111) downloaded from the NCBI GEO database GSE76925. **b-c** Data are extracted from the NCBI

215 GEO database GSE151674 **b** The expression of *Ptges*, *Ptges2*, *Ptgis*, *Ptger1*, *Ptger2*, *Ptger3*, *Ptger4*

216 and *Ptgir* in epithelial cells using scRNA-seq analysis of mouse lung tissue. **c** The expression of *Ptges*,

217 *Ptges2*, *Ptgis*, *Ptger1*, *Ptger2*, *Ptger3*, *Ptger4* and *Ptgir* in mesenchymal cells using scRNA-seq analysis

218 of mouse lung tissue. **d** Quantification of normalized number of alveolar type organoids treated with

219 vehicle control, or 5% CSE  $\pm$  PGE2 agonist (16,16-dimethyl prostaglandin E2)/iloprost. **e** Quantification

220 of normalized number of SPC<sup>+</sup> organoids treated with vehicle control, or 5% CSE  $\pm$  PGE2 agonist

221 (16,16-dimethyl prostaglandin E2) or iloprost. **f** Quantification of normalized number of alveolar type of

222 organoids treated with vehicle control, or 5% CSE  $\pm$  selective EP2 or EP4 agonist. Data are presented

223 as mean  $\pm$  SEM. \*p < 0.05, \*\*p < 0.01, \*\*\*p < 0.001, \*\*\*\*p < 0.0001.

224 To further characterize the effects of PGE2 and PGI2 on defective alveolar epithelial  
225 progenitors, we examined them *in vitro* (Fig. 3d-f) and *in vivo* (Fig. 4) CS(E). The PGE2  
226 analogue 16,16-dimethyl prostaglandin E2 and the prostacyclin analogue iloprost both  
227 increased the number of alveolar type organoids even in the presence of 5% CSE (Fig.  
228 3d) and significantly increased the number of SPC<sup>+</sup> organoids under conditions of CSE  
229 exposure (Fig. 3e). To address the relative roles of the two Gs-coupled PGE2  
230 receptors, EP2 and EP4, we evaluated the selective agonists ((R)-Butaprost and 5-  
231 [(3S)-3-hydroxy-4-phenyl-1-buten-1-yl]1-[6-(2H-tetrazol-5R-yl)hexyl]-2-pyrrolidinone,  
232 CAY10598) of these receptors. Focus was on these Gs coupled receptors, as we  
233 found that cholera toxin, a well-known inducer of constitutive adenylyl cyclase activity  
234 and cAMP signaling, increased organoid formation both with and without the exposure  
235 to CSE (Fig. S4a). The EP2 selective butaprost had no effects on organoid number  
236 (Fig. 3f) but increased the alveolar size in the absence and presence of 5% CSE (Fig.  
237 S5c). The EP4 selective agonist increased the number of alveolar type organoids  
238 significantly and prevented the number reduction resulting from 5% CSE exposure  
239 (Fig. 3f). The EP4 agonist also increased the size of both types of organoids in the  
240 absence and presence of 5% CSE (Fig. S5c). To explore whether duration of drug  
241 exposure affected organoid formation, the organoids were treated *in vitro* with PGE2  
242 analogue or PGI2 analogue for 3 different time windows during organoid development  
243 as illustrated in Supplementary figure 5d-g. These time windows were identified  
244 previously<sup>9</sup>, and mark the initial division phase (day 0-2), proliferation (day 2-7), and  
245 differentiation phase (day 7-14). We observed no effects on the number of organoids  
246 for any of the short-term drug treatments, suggesting continuous treatment with or  
247 iloprost during all phases of organoid formation is required.

248 To examine the effects of PGE2 and PGI2 *in vivo*, we exposed mice to air (vehicle  
249 control), CS, CS + misoprostol (PGE2 analogue), or CS + iloprost as shown in Figure  
250 4. To assess the impact of *in vivo* cigarette smoke (CS) exposure, we isolated CD31-  
251 /CD45-/EpCAM<sup>+</sup> cells from mice exposed to air or CS and co-cultured these with  
252 CCL206 fibroblasts *in vitro* for 14 days (Fig. 4a). Interestingly, the number of alveolar  
253 organoids was significantly decreased after *in vivo* CS exposure indicating that a  
254 relatively short exposure to cigarette smoke *in vivo* is sufficient to capture early  
255 changes in progenitor cell function (Fig. 4c). Cigarette smoke exposure did not change  
256 the yield of CD31-/CD45-/EpCAM<sup>+</sup> cells, whereas exposing mice to misoprostol or  
257 iloprost increased the yield of EpCAM<sup>+</sup> cells (Fig. S6a). The organoid assay revealed  
258 that *in vivo* (i.p.) treatment with either misoprostol or iloprost significantly increased the  
259 number of alveolar type and SPC<sup>+</sup> organoids (Fig. 4e-f) *ex vivo*. Next, to investigate  
260 whether *in vitro* drug treatment would have similar effects on damage caused by *in*  
261 *vivo* CS exposure, we isolated EpCAM<sup>+</sup> cells from either air- or CS-exposed mice and  
262 subjected these to *in vitro* misoprostol or iloprost treatment in the organoid assay for  
263 14 days (Fig. 4g). *In vitro* misoprostol increased the number of alveolar type organoids  
264 in cultures derived from CS-exposed mice (Fig. 4h). Only *in vitro* misoprostol increased  
265 the size of alveolar organoids derived from CS-exposed animals (Fig. S6c). Taken  
266 together, our data show that PGE2 and PGI2 analogues protect alveolar epithelial  
267 progenitor function from the effects of CS exposure. In addition, EP4 rather than EP2  
268 seems to mediate the protective effects of PGE2.

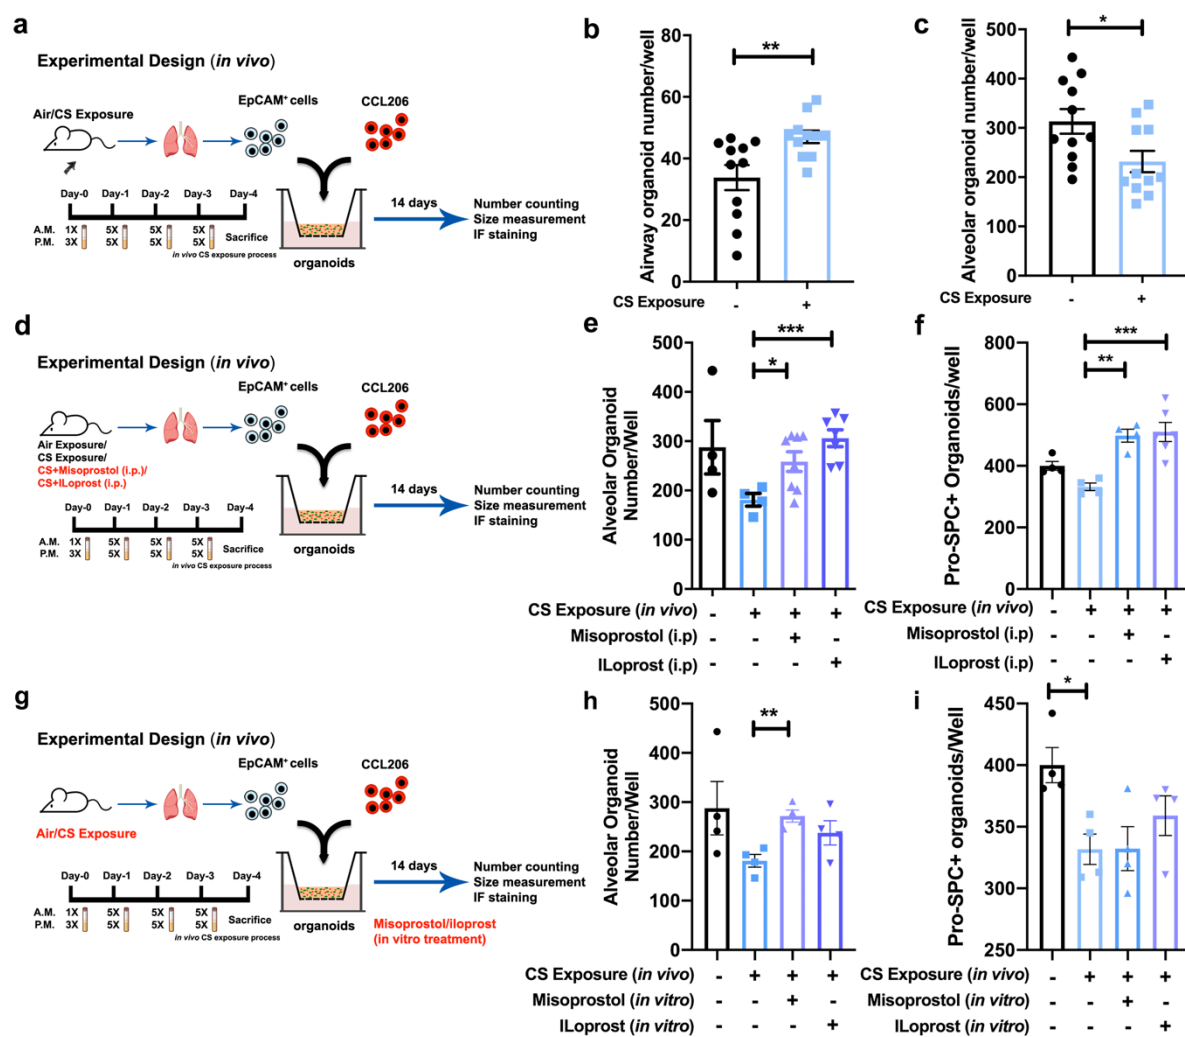

269

270 **Figure 4 Administration (*in vivo* and *in vitro*) of misoprostol and iloprost to cigarette smoke-**

271 **exposed mice restored lung organoid formation. a** Schematic of *in vivo* CS exposure experimental

272 **setup. b-c** Number of airway and alveolar type organoids quantified on day 14 of co-culturing CCL-206

273 **fibroblasts and EpCAM<sup>+</sup> cells (isolated from air exposed/CS exposed mice). N = 11 experiments. d**

274 **Schematic of experimental design. Organoids were generated from air- or CS-exposed mice treated *in***

275 ***in vivo* with misoprostol (i.p.) or iloprost (i.p.); all organoids were treated with normal organoid medium. e-**

276 ***f* Number of alveolar type and pro-SPC<sup>+</sup> organoids quantified on day 14 from co-culture of CCL-206**

277 **fibroblasts and EpCAM<sup>+</sup> cells (isolated from air- (control) and CS-exposed mice treated intraperitoneally**

278 **with misoprostol or iloprost). *g* Schematic of experimental design. Organoids were generated from mice**

279 **exposed to air or CS. Misoprostol and iloprost were added *in vitro* to the organoid medium for treatment.**

280 ***h-i* Number of alveolar type and SPC<sup>+</sup> organoids quantified on day 14 from co-culture of CCL-206**

281 **fibroblasts and EpCAM<sup>+</sup> cells (isolated from air- and CS-exposed mice) treated with misoprostol/iloprost**

282 ***in vitro*. Data are presented as mean  $\pm$  SEM. \**p* < 0.05, \*\**p* < 0.01, \*\*\**p* < 0.001, \*\*\*\**p* < 0.0001.**

283 **Distinct genetic signatures in regulation of defective alveolar epithelial repair.**

284 To unravel the transcriptional changes leading to impaired lung organoid formation  
285 after exposure to CS as well as the mechanisms underlying the beneficial effects of  
286 PGE2 and PGI2 treatment, we performed RNA sequencing (Fig. 5a) on EpCAM<sup>+</sup> cells  
287 isolated from mice exposed to air (control), CS, CS + misoprostol(i.p.), or CS + iloprost  
288 (i.p.), directly after the isolation procedure (i.e., prior to inclusion in the organoid assay).  
289 Principal-component analysis (PCA) revealed that the CS-exposed group is  
290 transcriptionally distinct from the control group (Fig. 5b), and that the CS/misoprostol  
291 and CS/iloprost groups are transcriptionally different from the CS exposed group. The  
292 top 20 differentially expressed genes from these three comparisons, including both  
293 up- and downregulated genes, are shown in the heatmaps (Fig. 5c) and summarized  
294 in supplementary materials. Reactome pathway analysis was used to identify  
295 molecular pathways overrepresented in CS/misoprostol/iloprost-modulated genes in  
296 alveolar epithelial cells. Within the top 20 enriched pathways (Fig. 5d, supplementary  
297 materials), genes associated with cell cycle, mitotic prometaphase, DNA  
298 replication/synthesis and RHO GTPases activate formins signaling pathways were  
299 upregulated by CS exposure compared to air (control) exposure, however, these were  
300 downregulated by treatment with misoprostol or iloprost. Notably, genes associated  
301 with the circadian clock signaling pathway were downregulated by CS exposure but  
302 restored by treatment with misoprostol or iloprost. Moreover, signaling by FGFR1, 3  
303 and 4 were downregulated in response to CS exposure, whereas the same signaling  
304 pathways were upregulated by misoprostol but not iloprost treatment. These findings  
305 suggest that the repairing mechanisms of misoprostol and iloprost in response to CS  
306 were common in cell cycle and circadian clock signaling and the distorted FGFR  
307 signaling resulted from CS was corrected by misoprostol uniquely. In addition, the

308 nuclear receptor transcription pathway, growth hormone receptor signaling, MAPK,  
 309 WNT and cell-cell communication signaling pathways appear to downregulate in  
 310 response to CS, which were not observed in either misoprostol/iloprost treatment  
 311 group. Overall, the RNA-seq analysis demonstrates both common and distinct  
 312 transcriptomic mechanisms of misoprostol and iloprost treatment in response to CS  
 313 exposure in alveolar epithelial progenitors.

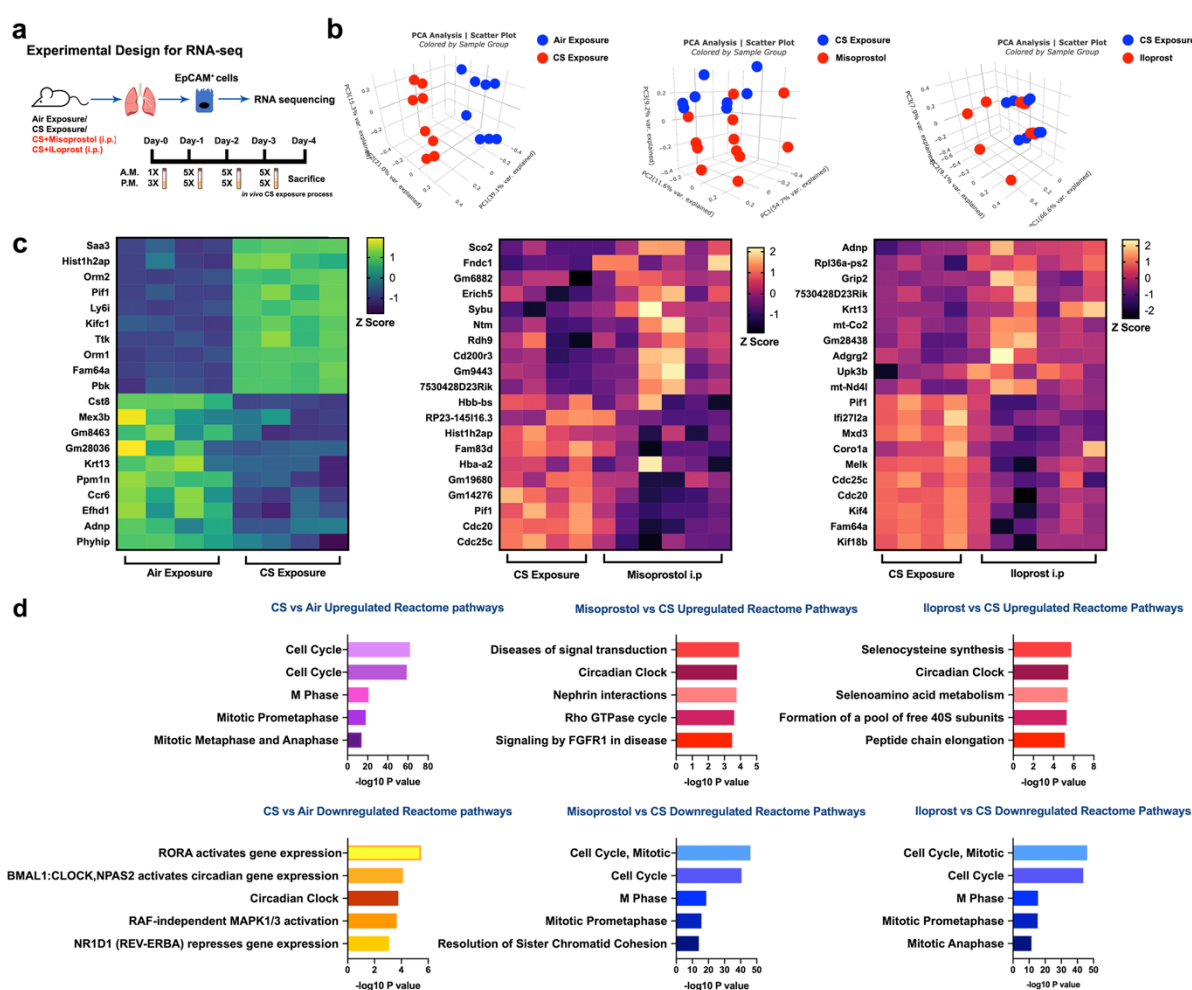

314  
 315 **Figure 5 Transcriptomic signatures in response to cigarette smoke with(out) misoprostol and**  
 316 **iloprost. a** Schematic experimental design for RNA sequencing. **b** PCA plots demonstrate the clusters  
 317 between different comparisons: air vs CS, CS vs CS+misoprostol, and CS vs CS+iloprost. **c** Heatmaps  
 318 displaying the top 20 differentially expressed genes in air vs CS, CS vs CS+misoprostol, and  
 319 CS+iloprost exposed epithelial cells. **d** The top 5 significantly up- and downregulated reactome



320 pathways enrichment from differentially expressed genes within the comparisons of air vs CS exposure,  
321 CS exposure vs CS+misoprostol, and CS exposure vs CS+iloprost.

322

## 323 **Discussion**

324 Chronic obstructive pulmonary disease results from repeated micro-injuries to the  
325 epithelium often caused by tobacco smoking. In susceptible individuals, this results in  
326 tissue remodeling in the conducting airways and destruction of the respiratory  
327 bronchioles and alveoli<sup>19</sup>. No clinically approved pharmacological treatment prevents  
328 or reverses the tissue destruction in the distal lung. The results of our study are in line  
329 with this contention and demonstrate that the PDE4 inhibitor rolipram and the  
330 corticosteroid budesonide had no, or only very limited, beneficial effects on impaired  
331 organoid growth and differentiation in response to cigarette smoke extract *in vitro* or  
332 in response to cigarette smoke exposure *in vivo*. In fact, if anything, budesonide  
333 appeared to restrict progenitor cell growth, which is a concern given the wide use of  
334 corticosteroids in the management of COPD. This underscores the need for novel drug  
335 targets.

336 Consequently, we set out to search for new potential drug targets for lung repair in  
337 COPD and identify EP and IP receptor agonists as two such potential targets, by  
338 utilizing a transcriptomics-guided drug discovery strategy. Both EP and IP receptor  
339 agonists were able to promote epithelial repair responses after exposure to cigarette  
340 smoke (extract). Whereas PGE2 and PGI2 showed the most profound changes, other  
341 methods including ACSS2 agonism, LEPR agonism and IBSP agonism yielded  
342 smaller effects. ACSS2 supports acetyl-CoA synthesis from acetate in the cytosol<sup>20,21</sup>,  
343 and thereby plays an important role in lipid metabolism and in the regulation of histone  
344 acetylation in the nucleus during gene transcription. IBSP is a member of the small

345 integrin-binding ligand N-linked glycoprotein (SIBLING) family<sup>22,23</sup>, which is associated  
346 with bone metastases of lung cancer<sup>24</sup>. LEPR (leptin receptor), is an adipocytokine  
347 that has a central role in regulating food intake and energy expenditure<sup>25</sup>, but has also  
348 been linked to lung function decline in a population in COPD<sup>26</sup>. Nonetheless, among  
349 all the candidate targets, PGE2 (*PTGES2*) and PGI2 (*PTGIR*) analogues emerged as  
350 the most promising compounds among all drugs in the current study. Prostaglandins  
351 (PGs) are lipid mediators synthesized from arachidonic acid (AA) via the  
352 cyclooxygenase pathway, and include PGD<sub>2</sub>, PGI<sub>2</sub>, PGH<sub>2</sub>, PGE<sub>2</sub> and PGF<sub>2</sub>α<sup>27</sup>. PGI<sub>2</sub>  
353 signals via IP receptors to induce cAMP signaling, similar to EP<sub>4</sub> receptors. We show  
354 EP<sub>4</sub> receptors to have similar expression as in non-COPD controls, whereas IP  
355 receptors are expressed at higher levels in COPD patients indicating the expression  
356 of both receptors is maintained in disease.

357 We show that PGE<sub>2</sub> agonists are beneficial in reducing CS-induced damage in  
358 alveolar epithelial progenitors. However, PGE<sub>2</sub> has been reported as an unstable  
359 molecule with an extremely short half-life; therefore, targeting its receptors with  
360 specific more stable analogues may be a better alternative. PGE<sub>2</sub> is the most widely  
361 produced PG in the human body and it signals via four specific G-protein-coupled  
362 receptors (EP<sub>1-4</sub><sup>28,29</sup>). The interactions between PGE<sub>2</sub> and EP receptors depend on  
363 tissue and cell type, specific receptor expression, and differences in binding affinities,  
364 leading to unique patterns of EP receptor activation<sup>30</sup>. PGE<sub>2</sub> can stimulate cAMP  
365 production through EP<sub>2</sub> and EP<sub>4</sub> receptors, whereas EP<sub>3</sub> activation results in  
366 decreased cAMP synthesis and EP<sub>1</sub> stimulation is coupled to G<sub>q</sub>-activation and  
367 (enhanced) Ca<sup>2+</sup> signaling<sup>27,30,31</sup>. EP<sub>1</sub> and EP<sub>3</sub> receptors can mediate  
368 bronchoconstriction indirectly through activation of neural pathways<sup>32</sup>, as a  
369 consequence non-selective PGE<sub>2</sub> analogues are unsuitable as pulmonary drugs.

370 Therefore, we selected analogues of EP2 and EP4 to mimic effect of PGE2 in our  
371 organoid assay, and demonstrated that EP4 agonism showed beneficial effects  
372 against impaired organoid formation in response to (CS)E exposure. Targeting EP4  
373 receptors is worthwhile investigating in more detail in the future, as the effects may  
374 surpass epithelial repair only. Additional beneficial effects of EP4 agonism in COPD  
375 may include bronchoprotection<sup>33</sup> and inhibition of inflammation<sup>34</sup>, suggesting that EP4  
376 agonism could unify several functional features that support the treatment of COPD,  
377 making this an intriguing pharmacological target.

378 Iloprost, a stable PGI2 analogue<sup>27,35-39</sup>, has been shown to have anti-inflammatory  
379 effects and protects against bleomycin-induced pulmonary fibrosis in mice<sup>36</sup>, and is  
380 also clinically used for the treatment of pulmonary hypertension<sup>35</sup>. Although a recent  
381 study<sup>38</sup> showed iloprost improved clinical outcomes in COPD patients with poor lung  
382 oxygenation, its impact on alveolar repair is unknown. Here we show that iloprost  
383 prevents the repressed organoid formation resulting from CS(E) exposure.

384 By generating transcriptomic signatures of epithelial progenitors derived from mice  
385 exposed *in vivo* to air, CS, CS + misoprostol or CS + iloprost, we uncovered dynamic  
386 molecular signaling pathways in response to CS exposure. Intriguingly, we identified  
387 circadian clock signaling as being significantly repressed in the alveolar epithelial  
388 progenitors derived from mice exposed to CS, which could be improved by either  
389 misoprostol or iloprost treatment. Circadian rhythms<sup>40-43</sup> are normally generated and  
390 regulated by clock genes, including *BMAL1* (*ARNTL1*) and *CLOCK* encoding  
391 activators, period (*PER1-3*) and cryptochrome genes (*CRY1-2*) that encode  
392 repressors, and the nuclear receptors Rev-erb (*NR1D1* and *NR1D2*) and *RORA* which  
393 constitute secondary regulatory loops. These core clock genes not only activate or  
394 repress a cell-autonomous clock, but also regulate the clock-controlled genes

395 (CCGs)<sup>44</sup>, thus interacting with other molecular signaling pathways. Previously, it has  
396 been demonstrated that clock signaling is downregulated in CS exposed mice, linked  
397 to an impairment of anti-oxidant defense mechanisms<sup>45</sup> and Rev-erba has been  
398 shown as an key regulator of inflammatory response in lung injury models<sup>16–18,46</sup>

399 Furthermore, we found that CS exposure upregulated pathways associated with cell  
400 cycle activity in alveolar epithelial progenitors, which could be counteracted by *in vivo*  
401 misoprostol or iloprost treatment. The cell cycle<sup>47–51</sup> is driven by a set of tightly  
402 regulated molecular events controlling DNA replication and mitosis with four phases,  
403 and each individual cell may require different triggers in order to decide whether to  
404 enter proliferation or apoptosis. To further assess alveolar epithelial progenitors under  
405 which cell cycle/apoptotic status in response to CS exposure as well as additional  
406 PGE2/PGI2 treatments may be the next step to investigate in the future. A link between  
407 circadian clock and cell cycle signaling pathways has been proposed<sup>44,50,52</sup>.  
408 Importantly, the molecular control of the biological clock is dependent on cAMP  
409 signaling and cAMP activators are known to entrain the biological clock<sup>53</sup>, explaining  
410 the link between PGE2 and PGI2 activation and restoration of the defective clock  
411 signaling in combination with CS exposure. Hence, it is of great interest to determine  
412 in more molecular detail how these two oscillatory systems communicate in regulating  
413 PGE2/PGI2-mediated lung repair in future studies.

414 In conclusion, in this study we demonstrate for the first time the protective effects of  
415 several drug candidates, and in particular PGE2 and PGI2 analogues, against *in vivo*  
416 and *in vitro* CS(E)-induced damage of alveolar epithelial progenitors. Furthermore,  
417 using transcriptome analysis, we show that CS induces a wide range of transcriptional  
418 changes, including alterations of circadian clock and cell cycle signaling pathways,  
419 which can be counteracted by either misoprostol (PGE2) or iloprost (PGI2) treatment.

420 Overall, these data provide promising therapeutic strategies to specifically address  
421 defective lung repair in respiratory diseases, in particular targeting EP4 and IP  
422 receptors.

## 423 **Methods**

424 **Animals.** All mouse experiments for organoid study were performed at the Central  
425 Animal Facility (CDP) of the University Medical Center Groningen (UMCG) in  
426 accordance with the national guidelines and upon approval of the experimental  
427 procedures by CDP and the Institutional Animal Care and Use Committee (IACUC) of  
428 the University of Groningen (CCD license AVD105002015303). C57BL/6J (555) and  
429 BALB/cByJ (Jax-strain) mice (both genders, 8–12 weeks of age) were maintained  
430 under 12-h light/ dark cycles and were allowed food and water ad libitum. Animals for  
431 circadian clock studies were exposed to CS and/or administrated with compounds at  
432 the same time of the day for all mice in all groups. Animals were euthanized at the  
433 same time of the day. Adult (female, 8-10 weeks of age) C57BL/6N mice were  
434 obtained from Charles River (Sulzfeld, Germany) for the single cell RNAseq analysis  
435 of lungs following exposure to chronic CS. These experiments were performed at the  
436 Helmholtz Zentrum München and approved by the ethics committee for animal welfare  
437 of the local government for the administrative region of Upper Bavaria  
438 (Regierungspräsidium Oberbayern) and were conducted under strict governmental  
439 and international guidelines in accordance with EU Directive 2010/63/EU.

440

441 **Human material.** The human lung tissue was obtained from lung transplant donors  
442 according to the Eurotransplant guidelines including the absence of primary lung  
443 diseases such as asthma and COPD, and no more than 20 pack years of smoking  
444 history<sup>54</sup>. Gene expression in human lung published data sets was obtained by down  
445 loading series matrix files from the NCBI GEO database for GSE76925<sup>55</sup> and gene  
446 expression normalized to healthy smokers.

447

448 ***In vivo* cigarette smoke exposure.** Mice (n = 4–11/group, 10-12 weeks old) were  
449 exposed (whole body) to 3R4F research cigarettes (Tobacco Research Institute,  
450 University of Kentucky, Lexington, KY) for four consecutive days (two sessions/day, 8  
451 hours between each exposure) to establish an acute smoke-induced inflammation  
452 model, as described previously<sup>8</sup>. In the cigarette smoke (CS) group, mice were  
453 exposed to 1 cigarette in the morning and 3 in the afternoon on day 1. From day 2 to  
454 4, mice were exposed to 5 cigarettes each session. All cigarettes were smoked without  
455 a filter in 5 min at a rate of 5L/h in a ratio with 60 L/h air using a peristaltic pump (45  
456 rpm, Watson Marlow 323 E/D, Rotterdam, NL). In the control group, mice were  
457 exposed to fresh air using similar exposure chambers as the CS group.

458 In some studies, budesonide was nebulized (0.1 mM, 15 min/mouse/exposure) to  
459 wild-type mice (n = 6) prior to each CS exposure. In separate studies, intraperitoneal  
460 (IP) injections of 50 µg misoprostol or 50 µg iloprost were given 30 min to wild-type  
461 mice (n = 6-8) prior to each CS exposure. On day 5, mice were sacrificed, and the  
462 lungs were immediately used for establishing organoid cultures or stored at - 80°C for  
463 further experimental uses.

464 For the single cell RNAseq analysis of lungs CS was generated from 3R4F  
465 Research Cigarettes with the filters removed. Mice were whole body exposed to active  
466 100% mainstream CS of 500 mg/m<sup>3</sup> total particulate matter (TPM) for 50 min twice per  
467 day for 4m in a manner mimicking natural human smoking habits as previously  
468 described<sup>55</sup>

469

470 **Fibroblast culture.** Mouse fibroblasts, CCL206 (Mlg [CCL206], ATCC, Wesel,  
471 Germany) were cultured in DMEM/F12 medium supplemented with 10% (v/v) fetal  
472 bovine serum, 100 U/mL penicillin/streptomycin, 2 mM L-glutamine, and 1%

473 amphotericin B in a humidified atmosphere under 5% CO<sub>2</sub>/95% air at 37°C, as  
474 previously described<sup>6,9,56</sup>. For organoid experiments, fibroblasts were proliferation-  
475 inactivated by incubation in mitomycin C (10 µg/mL, Sigma, M4287) for 2 h, followed  
476 by 3 washes with PBS after which the cells were trypsinized before introduction into  
477 the organoid co-cultures. Human lung fibroblasts MRC5 (CCL-171; ATCC, Wesel,  
478 Germany) were cultured in Ham's F12 medium supplemented with the same additives  
479 as the murine fibroblasts medium.

480

481 **Cigarette smoke extract (CSE).** The smoke of two 3R4F research cigarettes was  
482 pumped into 25 mL warm fibroblasts culture medium to produce 100% cigarette smoke  
483 extract (CSE)<sup>11</sup>. All cigarettes were without a filter and smoke was passed through the  
484 medium using a peristaltic pump (45 rpm, Watson Marlow 323 E/D, Rotterdam, NL).  
485 CSE was freshly prepared before each set of experiments.

486

487 **Organoid culture.** The organoid culture system is based on previously published  
488 protocols from our group<sup>6,9,56</sup>. In brief, epithelial cells (CD31<sup>-</sup>/CD45<sup>-</sup>/CD326<sup>+</sup>) were  
489 freshly isolated from murine or human lung tissue and co-cultured with murine CCL206  
490 or human MRC5 fibroblasts, respectively, in Matrigel® (Corning Life Sciences B.V.,  
491 Amsterdam, The Netherlands). EpCAM<sup>+</sup> (CD31<sup>-</sup>/CD45<sup>-</sup>/CD326<sup>+</sup>) cells were isolated  
492 from mouse lung tissue (without the trachea) using the QuadroMACS™ Separator and  
493 antibody-bound magnetic beads (Miltenyi Biotec, Leiden, The Netherlands). EpCAM<sup>+</sup>  
494 cells and fibroblasts were mixed 1:1 (20,000 cells each) and suspended in 100 µL of  
495 Matrigel prediluted 1:1 (v/v) with DMEM supplemented with 10% FBS. This mixture of  
496 cells was added to a 24-well Falcon® cell culture insert (Corning, USA) within a 24-  
497 well plate containing 400 µL of organoid media (DMEM/F-12 supplemented with 5%



498 FBS, 1% penicillin/streptomycin, 1% glutamine, 1% amphotericin B, 0.025% EGF, 1%  
499 insulin-transferrin-selenium, and 1.75% bovine pituitary extract) underneath the insert  
500 in each well. Adult human donor tissue was isolated from histologically normal regions  
501 of lung tissue specimens obtained at University Medical Centre Groningen (Groningen,  
502 The Netherlands) from n = 7 patients (2 non-COPD and 5 COPD patients). Human  
503 lung tissues were incubated and homogenized overnight in an enzyme mixture at 4 °C;  
504 the EpCAM<sup>+</sup> isolation process was similar to that described above for murine lung  
505 tissue. Organoids were cultured in a humidified atmosphere under 5% CO<sub>2</sub>/95% air at  
506 37 °C and medium in the wells was refreshed every 2–3 days. To quantify the number  
507 of organoids, light microscopy at 20x magnification was used and organoids were  
508 counted manually. The diameter of the organoids (organoid size) was measured using  
509 NIS-Elements software with a light microscope.

510 For *in vitro* organoid experiments, organoids were continuously treated with control,  
511 1.25% (1% for human organoids), 2.5% or 5% CSE and organoid culture medium was  
512 refreshed every other day. All information on the pharmacological compounds used in  
513 this study is provided in the Supplementary table 1.

514

515 **Immunofluorescence staining.** The immunofluorescence staining assay for  
516 organoids was performed as described previously by our group with minor  
517 modifications<sup>6,9,56</sup>. Organoids were fixed in acetone diluted 1:1 (v/v) with methanol for  
518 15 min at –20 °C. After fixation, one mL of PBS with 0.02 % sodium azide was added  
519 to the well underneath the insert. Organoids were kept at 4°C for one week after  
520 fixation. BSA media was added on top of the insert for blocking at room temperature  
521 (RT) for 2h. Afterwards, primary antibody incubation was performed in PBS buffer with  
522 0.1% BSA and 0.1% Triton X-100 overnight at 4 °C. The next day, the organoids were

523 washed with PBS for 30 min three times and secondary antibody incubation was  
524 performed for 2h at RT. After washing with PBS for 15 min, the organoids on the insert  
525 membrane were transferred to a glass slide with two drops of mounting medium  
526 containing DAPI (Abcam 104139, Cambridge, UK), and a coverslip was applied.

527 The slides were kept at 4 °C. Confocal images were acquired using a Leica SP8  
528 microscope or a Leica DM4000B microscope. Images were obtained and analyzed  
529 with LASX (Leica) software (open resource, Leica Microsystems GmbH, Wetzlar,  
530 Germany).

531

532 **RNA extraction and RNA sequencing (RNA-seq) analysis.** The EpCAM<sup>+</sup> cells  
533 isolated from mice exposed to Air, CS, CS+misoprostol, or CS+iloprost were used to  
534 extract total RNA for RNA sequencing using NucleoSpin® RNA kit (Machery-Nagel,  
535 740955, Germany) according to the manufacturer's instructions. RNA concentrations  
536 and qualities were analyzed using Nanodrop spectrophotometer. An Illumina NovaSeq  
537 6000 sequencer was used for RNA-seq data analysis by GenomeScan  
538 (<https://www.genomescan.nl>). The procedure included data quality control, adapter  
539 trimming, alignment of short reads and feature counting. Library preparation was  
540 checked by calculating ribosomal (and globin) content. Checks for possible sample  
541 and barcode contamination were performed and a set of standard quality metrics for  
542 the raw data set was determined using quality control tools (FstQC v0.34 and FastQA).  
543 Prior to alignment, the reads were trimmed for adapter sequences using Trimmomatic  
544 v0.30. To align the reads of each sample, the ensemble mouse reference GRCm38  
545 (patch 6) was used. Data analyses following the RNA-seq studies were performed  
546 using the BioJupies platform (<https://amp.pharm.mssm.edu/biojupies/>)<sup>57</sup>. Gene

547 expression in murine lung published data sets was obtained by downloading series  
548 matrix files from the NCBI GEO database GSE151674.

549

550 **Statistics analysis.** All data are presented as mean  $\pm$  SEM unless indicated otherwise.

551 Unless stated otherwise, all data were assessed for statistical significance using two-

552 tailed Student's t-test or one-way ANOVA. The p-value indicating statistically

553 significant differences between the mean/median values are defined as follows: \*p <

554 0.05, \*\*p < 0.01, \*\*\*p < 0.001, \*\*\*\*p < 0.0001. Statistical analyses were performed with

555 GraphPad Prism 8 software.

556 **Acknowledgements:**

557 The authors would like to acknowledge the support from the Lung foundation  
558 Netherlands (Longfonds, grant 5.1.17.166) and China Scholarship Council  
559 (CSC201707720065).

560

561 **Author Contributions:**

562 Author X.W., R.G. conceptualized the project, analyzed and interpreted the data; R.G.,  
563 L.E.M.K., and M.S. supervised the project; X.W., A.M., M.K., L.E.M.K., A.Ö.Y., and  
564 R.G. assisted designing the experiments; X.W., S.B., V.V., L.A.V., and A.D'M.  
565 performed the experiments; X.W., T.M.C., and M.A. prepared the figures; T.M.C., M.A.,  
566 H.B.S., and A.Ö.Y. assisted in bioinformatics analysis; X.W., and R.G. wrote the  
567 manuscript; All authors reviewed and commented on the manuscript and agreed to  
568 the final version.

569

570 **Competing interest:**

571 Author V.V. and L.E.M.K. are employees of Aquilo BV. Author R.G. and M.K. are  
572 members of the BREATH consortium funded by the Lung foundation Netherlands  
573 (Longfonds). All other authors declare no competing interests.

574

## Supplementary tables and figures

Supplementary Table 1 Information of final drug lists screened on organoid assay.

| NO | Overlap Up   | Full name                                     | Drug/compound name                                      | Final concentrations | Article No.    | Company                 |
|----|--------------|-----------------------------------------------|---------------------------------------------------------|----------------------|----------------|-------------------------|
| 1  | CPS1         | Carbamoyl-phosphate synthase 1                | N-Acetyl-L-glutamic acid                                | 10 µM                | 855642-25G     | Sigma-Aldrich           |
| 2  | CTSC         | Cathepsin C/Dipeptidyl peptidase 1            | Cathepsin c inhibitor                                   | 1 µM                 | BI-9740        | Boehringer<br>Ingelheim |
| 3  | CXCL1        | C-X-C Motif Chemokine Ligand 1                | Reparixin (L-Lysine salt)                               | 100 nM               | Cayman - 21492 | Cayman chemical         |
| 4  | DMKN         | Dermokine                                     | Dermokine beta recombinant protein antigen              | 100 ng/mL            | NBP1-86840PEP  | Novus Biologicals       |
| 5  | PTGIR        | Prostaglandin I2 Receptor                     | iloprost                                                | 0.03-, 0.3-, 3 µM    | SML1651        | Sigma-Aldrich           |
| 6  | RAB8B        | RAB8B, Member RAS Oncogene Family             | CHEMBL384759/Guanosine 5'-diphosphate sodium salt (GDP) | 10 µM                | G7127          | Sigma-Aldrich           |
| 7  | TNNI3K       | TNNI3 Interacting Kinase                      | GSK-114                                                 | 10 µM                |                |                         |
| NO | Overlap Down | Full name                                     | Drug/compound name                                      |                      | Article No.    | Company                 |
| 1  | ACSS2        | Acyl-CoA Synthetase Short Chain Family Member | Acetyl coenzyme A sodium salt                           | 10 mM                | A2056-1MG      | Sigma-Aldrich           |
| 2  | ACSS2i       | 2                                             | ACSS2 inhibitor                                         | 10 mM                | S8588          | Selleckchem.com         |
| 3  | CHRM3        | Cholinergic Receptor Muscarinic 3             | Methacoline                                             | 10 µM                | A2251          | Sigma-Aldrich           |
| 4  | CHRM3i       |                                               | Atrophine                                               | 1 µM                 | A0132          | Sigma-Aldrich           |
| 5  | FGF17        | Fibroblast Growth Factor 17                   | Recombinant human FGF-17 protein                        | 10 ng/mL             | 319-FG-025     | R&D systems             |
| 6  | IBSP         | Integrin Binding Sialoprotein                 | Recombinant Human IBSP/Sialoprotein II Protein, CF      | 10 ng/mL             | 4014-SP-050    | R&D systems             |
| 7  | LEPR         | Leptin Receptor                               | Recombinant Mouse Leptin Protein, CF                    | 100 ng/mL            | L4146-1MG      | Sigma-Aldrich           |
| 8  | PTGES2       | Prostaglandin E Synthase 2                    | 16,16-dimethyl Prostaglandin E2                         | 0.03-, 0.3-, 3 µM    | D0160          | Sigma-Aldrich           |
|    |              |                                               | Misoprostol                                             | 3 µM                 | M6807          | Sigma-Aldrich           |
| 9  | SLC16A3      | Solute Carrier Family 16 Member 3             | Streptozocin                                            | 10 µM                | S0130-50MG     | Sigma-Aldrich           |
| 10 | SLC1A4       | Solute Carrier Family 1 Member 4              | L-Alanine                                               | 100 µM               | A7627-1G       | Sigma-Aldrich           |

Supplementary Table 2 Information of compounds used in organoid assay.

| Name                               | Final concentrations | Article No.                       | Company         |
|------------------------------------|----------------------|-----------------------------------|-----------------|
| Rolipram                           | 1-, 10 µM            | R6520                             | Sigma-Aldrich   |
| Budesonide                         | 1-, 10-, 100 nM      | B7777                             | Sigma-Aldrich   |
| Cholera toxin                      | 0.1 mg/mL            | C8052                             | Sigma-Aldrich   |
| (R) -Butaprost (EP2 analogue)      | 30 µM                | B6309                             | Sigma-Aldrich   |
| EP4 analogue*                      | 30 µM                | CAY10598                          | Cayman chemical |
| Forskolin                          | 10 µM                | F6886                             | Sigma-Aldrich   |
| IBMX (3-Isobutyl-1-methylxanthine) | 100 µM               | Obtained from AppliChem (Germany) |                 |
| db-cAMP (Bucladesine)              | 100 µM               | D0627                             | Sigma-Aldrich   |
| Olodaterol                         | 100 nM               | Obtained from AppliChem (Germany) |                 |

\*EP4 analouge: 5-[(3S)-3-hydroxy-4-phenyl-1-buten-1-yl]1-[6-(2H-tetrazol-5R-yl)hexyl]-2-pyrrolidinone

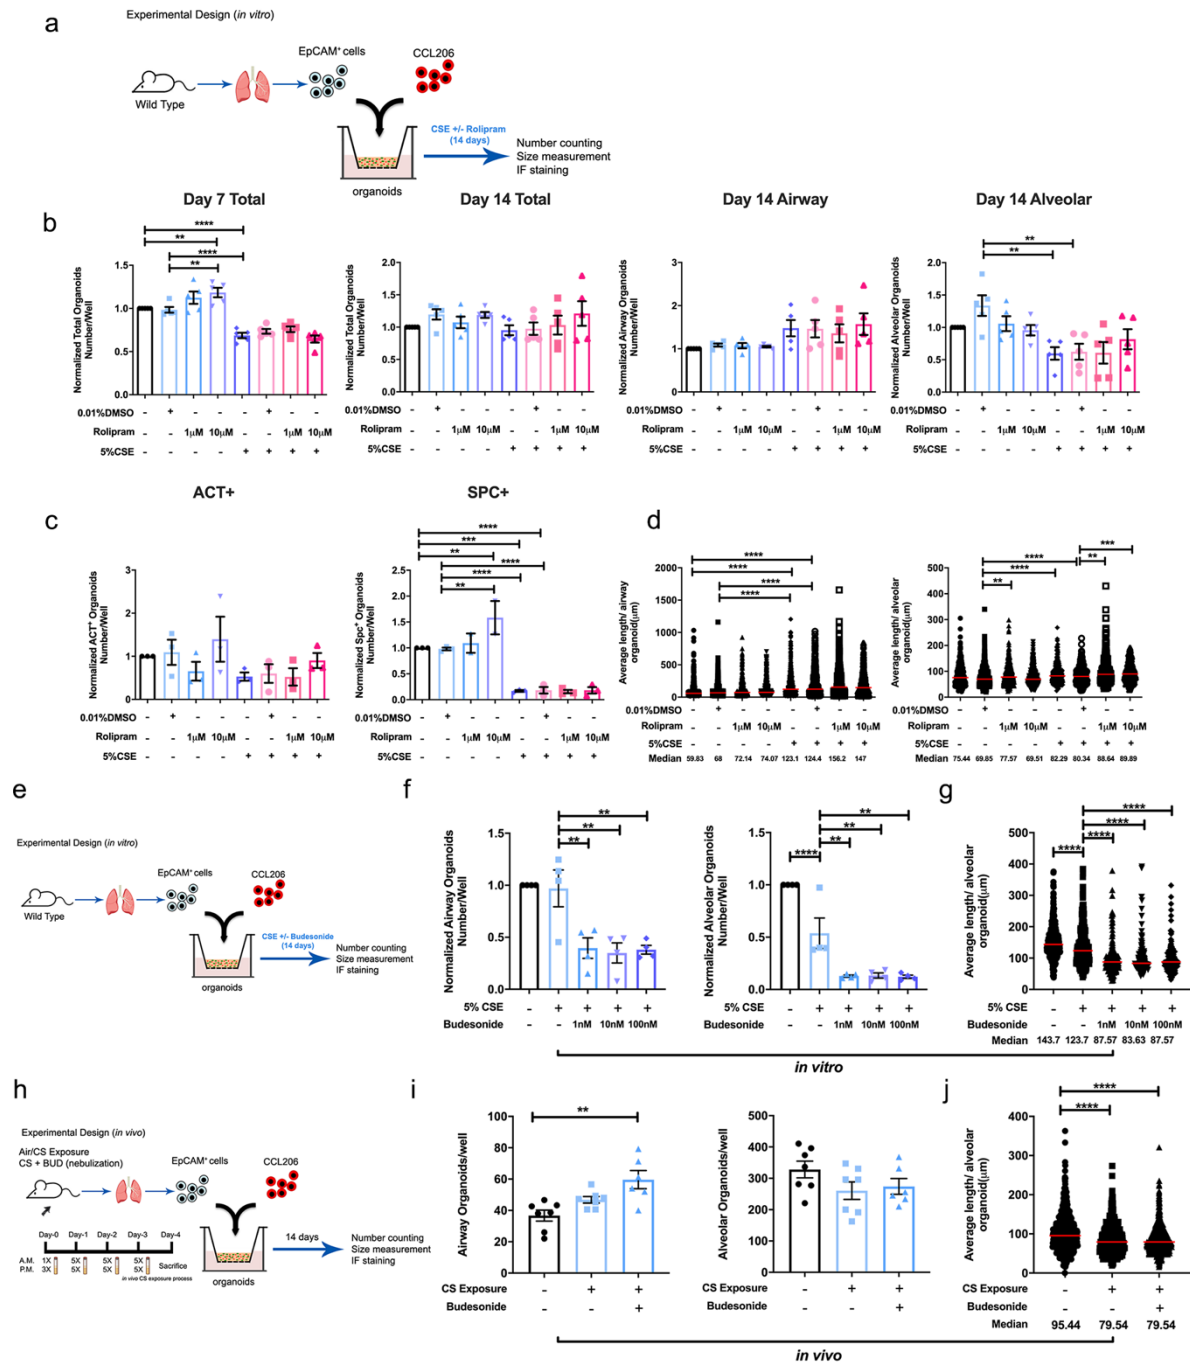

579

580 **Supplementary figure 1. Effect of Rolipram and Budesonide on lung organoid formation.**

581 **a** Schematic of *in vitro* experimental design. **b** Quantification of normalized number of total organoids  
 582 (day 7), total organoids (day 14), airway type organoids (day 14), alveolar type organoids (day 14)  
 583 treated with 5% CSE  $\pm$  rolipram (0-, 1-, 10 $\mu$ M). **c** Quantification of normalized ACT<sup>+</sup> and SPC<sup>+</sup> organoid  
 584 numbers treated with 5% CSE  $\pm$  rolipram (0-, 1-, 10 $\mu$ M) at Day 14. **d** Quantification of average length  
 585 (diameter) of airway and alveolar type organoids treated with 5% CSE  $\pm$  rolipram (0-, 1-, 10 $\mu$ M)  
 586 measured on day 14. N = 5 experiments, n > 503 organoids/group. Data are presented as scatter plots

587 with medians. **e** Schematic of *in vitro* experimental design. **f** Quantification of normalized number of  
588 airway and alveolar type organoids treated with 5% CSE  $\pm$  Budesonide (0-, 1-, 10-, 100 nM) measured  
589 on day 14. **g** Quantification of average length (diameter) of alveolar type organoids (median value)  
590 treated with 5% CSE  $\pm$  Budesonide (0-, 1-, 10-, 100 nM) measured on day 14. N = 4 experiments, n >  
591 165 organoids/group. Data are presented as scatter plots with medians. **h** Schematic of *in vivo*  
592 experimental design. **i** Number of airway and alveolar type organoids from co-culture of CCL-206  
593 fibroblasts and EpCAM<sup>+</sup> cells (isolated from air-exposed, CS-exposed, and CS-exposed + Budesonide  
594 nebulized mice) quantified on day 14. **j** Quantification of average length (diameter) of alveolar organoids  
595 (median value) from co-culture of CCL-206 fibroblasts and EpCAM<sup>+</sup> cells (isolated from air-exposed,  
596 CS-exposed, and CS-exposed + Budesonide nebulized mice) on day 14. N = 6 - 7 experiments, n >  
597 671 organoids/group. Data are presented as scatter plots with medians. \*\*p < 0.05, \*\*p < 0.01, \*\*\*p <  
598 0.001, \*\*\*\*p < 0.0001



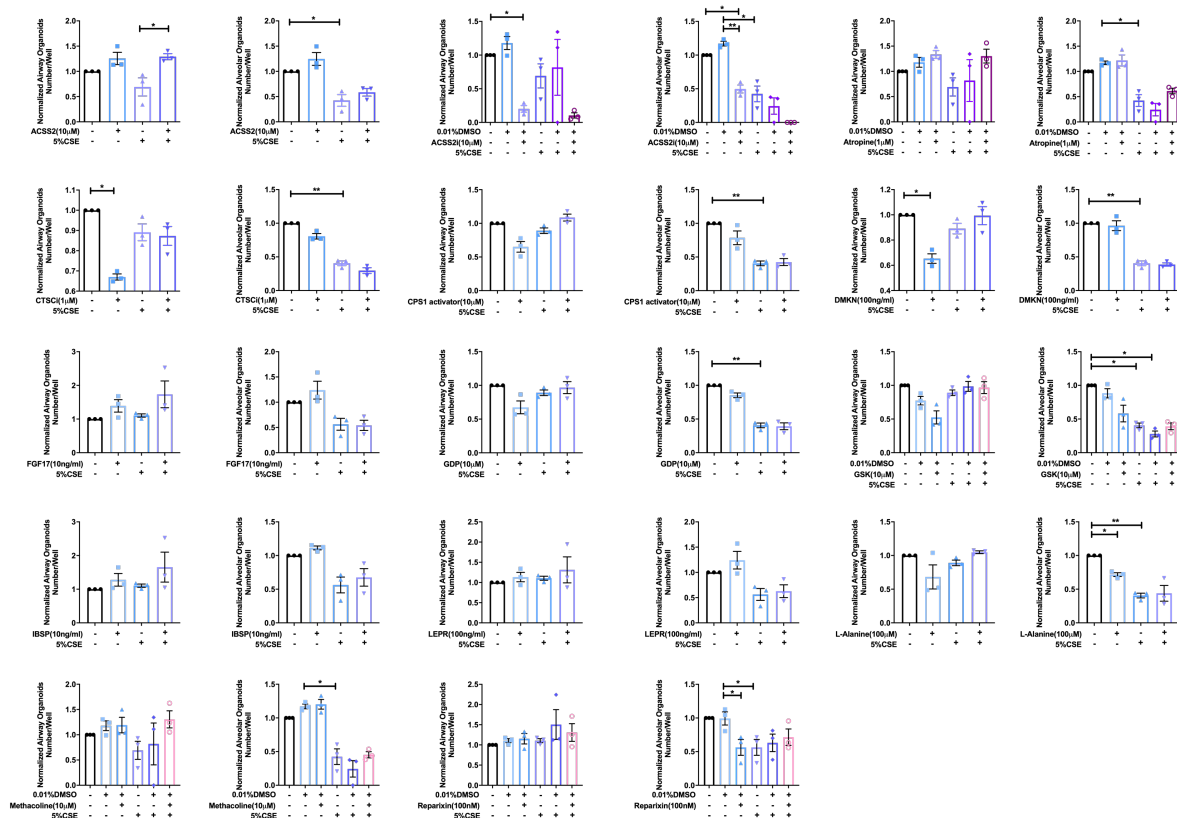

599

600 **Supplementary figure 2** Effects of 15 drugs candidates of interest (including an additional agonist and

601 antagonist for one gene target) on the normalized number of airway and alveolar type lung organoids

602 in the presence and absence of 5% CSE. Data are presented as median  $\pm$  SEM. \*\*p < 0.05, \*\*p < 0.01,

603 \*\*\*p < 0.001, \*\*\*\*p < 0.0001.

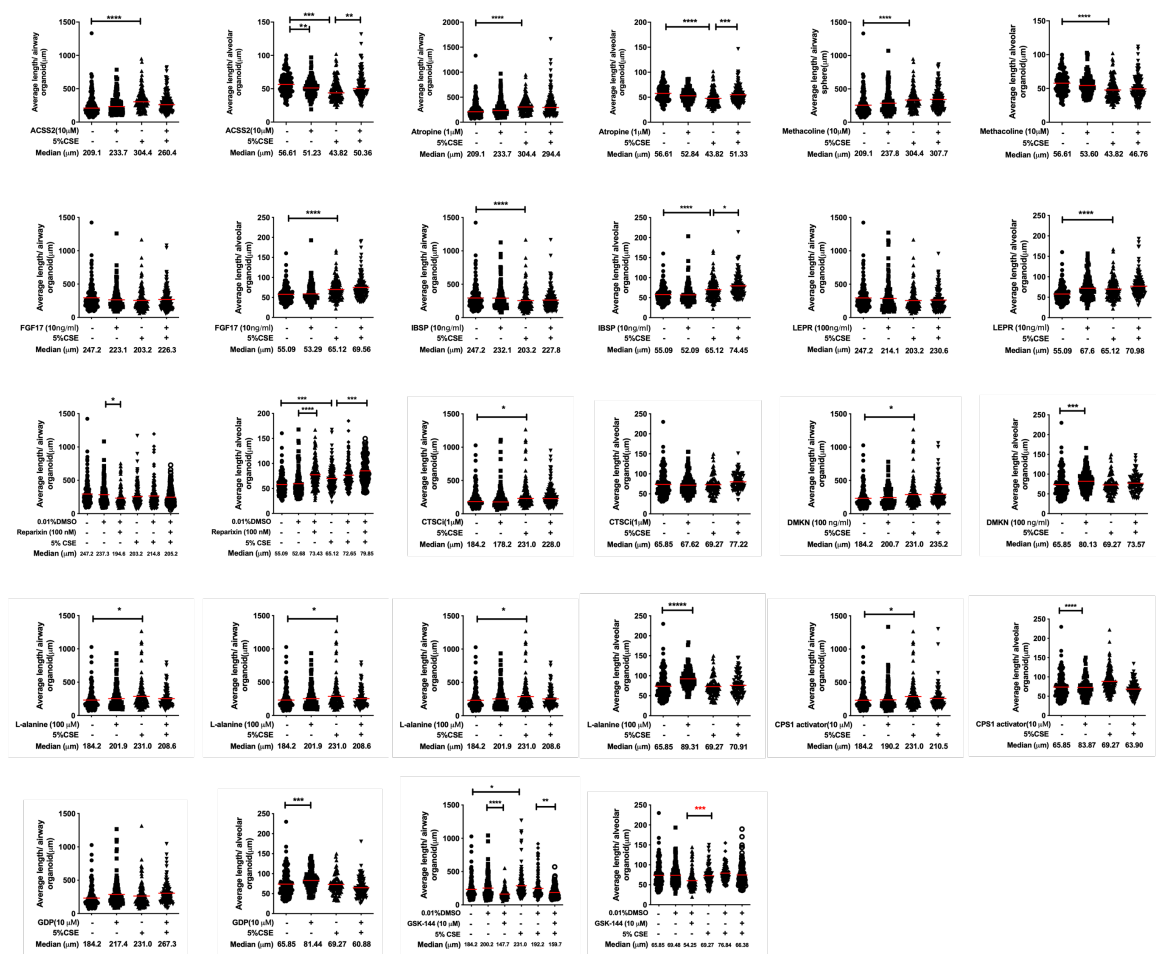

604

605 **Supplementary figure 3** Effects of 15 drugs candidates of interest (including an additional agonist and  
 606 antagonist for one gene target) on the size of airway and alveolar type lung organoids in the presence  
 607 and absence of 5% CSE. Data are presented as median  $\pm$  SEM. \*\* $p < 0.05$ , \*\*\* $p < 0.01$ , \*\*\*\* $p < 0.001$ ,  
 608 \*\*\*\* $p < 0.0001$ .

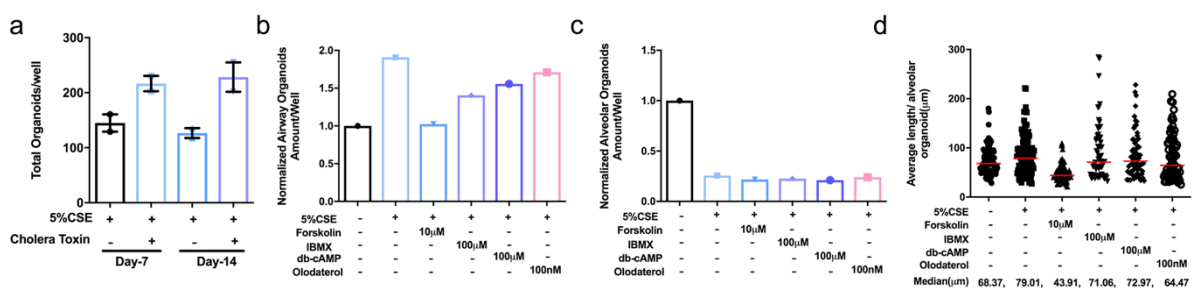

609

610 **Supplementary figure 4** Compounds related to cAMP signaling pathways tested on lung  
 611 organoid assay. **a** Quantification of total organoids treated with 5% CSE + cholera toxin at different  
 612 time points. **b** Quantification of normalized airway type organoids treated with 5% CSE  $\pm$  Forskolin (10  
 613  $\mu$ M), IBMX (100  $\mu$ M), db-cAMP (100  $\mu$ M), and olodaterol (100 nM). **c** Quantification of normalized  
 614 alveolar type organoids treated with 5% CSE  $\pm$  Forskolin (10  $\mu$ M), IBMX (100  $\mu$ M), db-cAMP (100  $\mu$ M),

615 and olodaterol (100 nM). **d** Quantification of average length (diameter) of alveolar type organoids  
616 (median value) treated with 5% CSE ± Forskolin (10  $\mu$ M), IBMX (100  $\mu$ M), db-cAMP (100  $\mu$ M), and  
617 olodaterol (100 nM). Data are presented as median  $\pm$  SEM. \*\*p < 0.05, \*p < 0.01, \*\*\*p < 0.001, \*\*\*\*p  
618 < 0.0001  
619

620

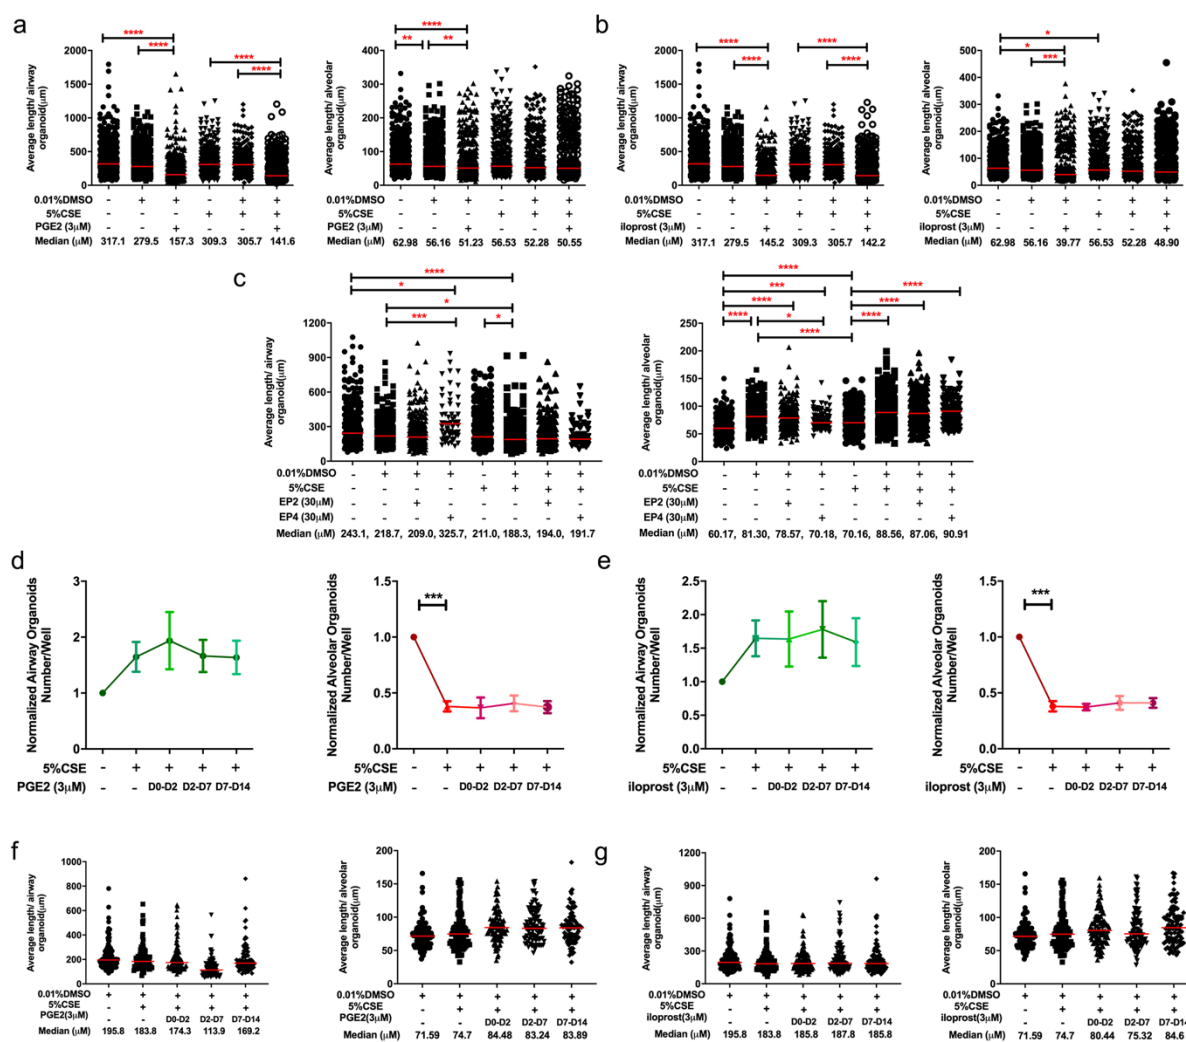

621

622 **Supplementary figure 5 Quantification of lung organoid numbers and sizes in the study of**  
 623 **PGE2/PGI2/EP2/EP4. a-b** Quantification of average length (diameter) of organoids (median value) of  
 624 airway and alveolar type organoids treated with 5% CSE  $\pm$  PGE2 agonist (a)/iloprost (b) measured on  
 625 day 14. N = 5 experiments, n > 334 organoids/group. Data are presented as median  $\pm$  SEM. **c**  
 626 Quantification of average length (diameter) of airway and alveolar type organoids (median value)  
 627 treated with 5% CSE  $\pm$  EP2/EP4 agonists measured on day 14. N = 5 experiments, n > 264  
 628 organoids/group. Data are presented as median  $\pm$  SEM. **d-e** Quantification of normalized number of  
 629 airway and alveolar type organoids treated with vehicle control, 5% CSE  $\pm$  PGE2 agonist (d)/ iloprost  
 630 (e) from day 0-2, day 2-7, or day 7-14. **f-g** Quantification of average length (diameter) of airway and  
 631 alveolar type organoids (median value) treated with 5% CSE  $\pm$  PGE2 agonist (f) / iloprost (g) from day

632 0-2, day 2-7, and day 7-14. N = 2 experiments, n > 85 organoids/group. Data are presented as median  
 633  $\pm$  SEM.

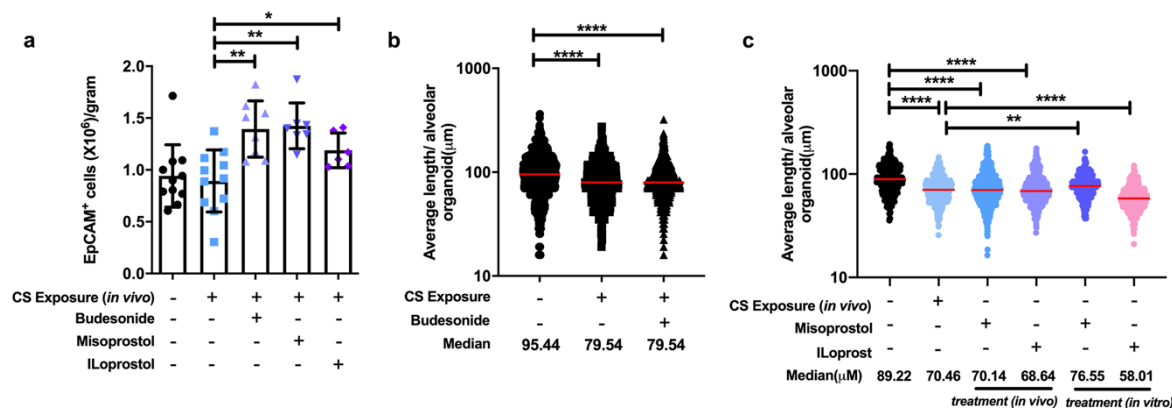

635 **Supplementary figure 6 Quantification analysis of lung organoid assay in the *in vivo* study of**  
 636 **PGE2/PGI2/Budesonide.** **a** Yield efficiency of EpCAM<sup>+</sup> cells from mice with different treatments. **b**  
 637 Quantification of average length of alveolar type organoids co-cultured from CCL-206 and EpCAM<sup>+</sup>  
 638 cells isolated from air- (control) or CS-exposed mice with or without *in vivo* treatment with misoprostol  
 639 or iloprost (i.p injection). N = 4-8 experiments, n = 400 organoids/group. **c** Quantification of average  
 640 length of alveolar type organoids co-cultured from CCL-206 and EpCAM<sup>+</sup> cells isolated from air- or CS-  
 641 exposed mice. Organoids were treated *in vitro* with misoprostol or iloprost for 14 days. N = 4-8  
 642 experiments, n = 400 organoids/group. Data are presented as median  $\pm$  SEM. \*\*p < 0.05, \*\*p < 0.01,  
 643 \*\*\*p < 0.001, \*\*\*\*p < 0.0001.

644  
 645

## 646 **References**

- 647 1. Kokturk, N., Yildirim, F., Gülhan, P. Y. & Oh, Y. M. Stem cell therapy in chronic  
648 obstructive pulmonary disease. How far is it to the clinic? *Am. J. Stem Cells* **7**,  
649 56–71 (2018).
- 650 2. Basil, M. C. *et al.* The Cellular and Physiological Basis for Lung Repair and  
651 Regeneration: Past, Present, and Future. *Cell Stem Cell* **26**, 482–502 (2020).
- 652 3. Volckaert, T. *et al.* Fgf10-Hippo Epithelial-Mesenchymal Crosstalk Maintains  
653 and Recruits Lung Basal Stem Cells. *Dev. Cell* **43**, 48-59.e5 (2017).
- 654 4. Hu, Y. *et al.* Wnt/ $\beta$ -catenin signaling is critical for regenerative potential of  
655 distal lung epithelial progenitor cells in homeostasis and emphysema. *Stem*  
656 *Cells* **38** (11) 1467-1478 (2020).
- 657 5. Conlon, T. M. *et al.* Inhibition of LT $\beta$ R signalling activates WNT-induced  
658 regeneration in lung. *Nature* **588**, 151–156 (2020).
- 659 6. Wu *et al.* Mesenchymal WNT-5A/5B Signaling Represses Lung Alveolar  
660 Epithelial Progenitors. *Cells* **8** (10), 1147 (2019).
- 661 7. Brandsma, C. A. *et al.* A large lung gene expression study identifying fibulin-5  
662 as a novel player in tissue repair in COPD. *Thorax* **70**, 21–32 (2015).
- 663 8. Kistemaker, L. E. M. *et al.* Muscarinic M3 receptors on structural cells regulate  
664 cigarette smoke-induced neutrophilic airway inflammation in mice. *Am. J.*  
665 *Physiol. - Lung Cell. Mol. Physiol.* **308**, L96–L103 (2015).
- 666 9. Ng-Blichfeldt, J. P. *et al.* Retinoic acid signaling balances adult distal lung  
667 epithelial progenitor cell growth and differentiation. *EBioMedicine* **36**, 461-474  
668 (2018).
- 669 10. Woodby, B. *et al.* The PDE4 inhibitor CHF6001 affects keratinocyte  
670 proliferation via cellular redox pathways. *Arch. Biochem. Biophys.* **685**, 1–8

- 671 (2020).
- 672 11. Zuo, H. *et al.* Cigarette smoke up-regulates PDE3 and PDE4 to decrease  
673 cAMP in airway cells. *Br. J. Pharmacol.* **175**, 2988–3006 (2018).
- 674 12. Kothe, T. B. *et al.* Surfactant and budesonide for respiratory distress  
675 syndrome: an observational study. *Pediatr. Res.* **87**, 940–945 (2020).
- 676 13. Ricci, F. *et al.* In vitro and in vivo characterization of poractant alfa  
677 supplemented with budesonide for safe and effective intratracheal  
678 administration. *Pediatr. Res.* **82**, 1056–1063 (2017).
- 679 14. Tashkin, D. P., Lipworth, B. & Brattsand, R. Benefit:Risk Profile of Budesonide  
680 in Obstructive Airways Disease. *Drugs* **79**, 1757–1775 (2019).
- 681 15. Waters, R. C. & Hochhaus, G. Characterization of a dextran-budesonide  
682 prodrug for inhalation therapy. *Eur. J. Pharm. Sci.* **129**, 58–67 (2019).
- 683 16. Shen, W. *et al.* SR9009 induces a REV-ERB dependent anti-small-cell lung  
684 cancer effect through inhibition of autophagy. *Theranostics* **10**, 4466–4480  
685 (2020).
- 686 17. Durrington, H. J. *et al.* Circadian asthma airway responses are gated by REV-  
687 ERB $\alpha$ . *Eur. Respir. J.* **56**, 1–13 (2020).
- 688 18. Sundar, I. K., Rashid, K., Sellix, M. T. & Rahman, I. The nuclear receptor and  
689 clock gene REV-ERB $\alpha$  regulates cigarette smoke-induced lung inflammation.  
690 *Biochem. Biophys. Res. Commun.* **493**, 1390–1395 (2017).
- 691 19. Gindele, J. A. *et al.* Intermittent exposure to whole cigarette smoke alters the  
692 differentiation of primary small airway epithelial cells in the air-liquid interface  
693 culture. *Sci. Rep.* **10**, 1–17 (2020).
- 694 20. Munir, R., Lisec, J., Swinnen, J. V. & Zaidi, N. Lipid metabolism in cancer cells  
695 under metabolic stress. *Br. J. Cancer* **120**, 1090–1098 (2019).

- 696 21. Gao, X. *et al.* Acetate functions as an epigenetic metabolite to promote lipid  
697 synthesis under hypoxia. *Nat. Commun.* **7**, (2016).
- 698 22. Whyte, M. P. *et al.* Hypophosphatemic osteosclerosis, hyperostosis, and  
699 enthesopathy associated with novel homozygous mutations of DMP1 encoding  
700 dentin matrix protein 1 and SPP1 encoding osteopontin: The first digenic  
701 SIBLING protein osteopathy? *Bone* **132**, 115190 (2020).
- 702 23. Shintani, S. *et al.* Identification and characterization of integrin-binding  
703 sialoprotein (IBSP) genes in reptile and amphibian. *Gene* **424**, 11–17 (2008).
- 704 24. Zhang, L. *et al.* Predictive significance of bone sialoprotein and osteopontin for  
705 bone metastases in resected Chinese non-small-cell lung cancer patients: A  
706 large cohort retrospective study. *Lung Cancer* **67**, 114–119 (2010).
- 707 25. Guo, X. *et al.* Leptin signaling in intestinal epithelium mediates resistance to  
708 enteric infection by *Entamoeba histolytica*. *Mucosal Immunol.* **4**, 294–303  
709 (2011).
- 710 26. Daniel E Shumer, N. J. N. N. P. S. Leptin receptor polymorphisms and lung  
711 function decline in COPD. *Physiol. Behav.* **176**, 139–148 (2017).
- 712 27. Lee, K., Lee, S. H. & Kim, T. H. The biology of prostaglandins and their role as  
713 a target for allergic airway disease therapy. *Int. J. Mol. Sci.* **21**, (2020).
- 714 28. Take, Y., Koizumi, S. & Nagahisa, A. Prostaglandin E Receptor 4 Antagonist in  
715 Cancer Immunotherapy: Mechanisms of Action. *Front. Immunol.* **11**, 1–7  
716 (2020).
- 717 29. Dey, I., Lejeune, M. & Chadee, K. Prostaglandin E 2 receptor distribution and  
718 function in the gastrointestinal tract. *Br. J. Pharmacol.* **149**, 611–623 (2006).
- 719 30. Markovič, T., Jakopin, Ž., Dolenc, M. S. & Mlinarič-Raščan, I. Structural  
720 features of subtype-selective EP receptor modulators. *Drug Discov. Today* **22**,



- 721 57–71 (2017).
- 722 31. Nunez, F. J. *et al.* Agonist-specific desensitization of PGE2-stimulated cAMP  
723 signaling due to upregulated phosphodiesterase expression in human lung  
724 fibroblasts. *Naunyn. Schmiedebergs. Arch. Pharmacol.* **393**, 843–856 (2020).
- 725 32. Tilley, S. L. *et al.* Receptors and pathways mediating the effects of  
726 prostaglandin E2 on airway tone. *Am. J. Physiol. - Lung Cell. Mol. Physiol.*  
727 **284**, 599–606 (2003).
- 728 33. Buckley, J. *et al.* EP4 receptor as a new target for bronchodilator therapy.  
729 *Thorax* **66**, 1029–1035 (2011).
- 730 34. Birrell, M. A. *et al.* Anti-inflammatory effects of PGE2 in the lung: Role of the  
731 EP4 receptor subtype. *Thorax* **70**, 740–747 (2015).
- 732 35. Wang, L. *et al.* Hemodynamic and gas exchange effects of inhaled iloprost in  
733 patients with COPD and pulmonary hypertension. *Int. J. COPD* **12**, 3353–3360  
734 (2017).
- 735 36. Zhu, Y. *et al.* A prostacyclin analogue, iloprost, protects from bleomycin-  
736 induced pulmonary fibrosis in mice. *Respir. Res.* **11**, 1–12 (2010).
- 737 37. Gohrbandt, B. *et al.* Iloprost to improve surfactant function in porcine  
738 pulmonary grafts stored for twenty-four hours in low-potassium dextran  
739 solution. *J. Thorac. Cardiovasc. Surg.* **129**, 80–86 (2005).
- 740 38. Kim, N. *et al.* Effects of Inhaled Iloprost on Lung Mechanics and Myocardial  
741 Function During One-Lung Ventilation in Chronic Obstructive Pulmonary  
742 Disease Patients Combined With Poor Lung Oxygenation. *Anesth. Analg.* **130**  
743 (5), 1407-1414 (2020).
- 744 39. Lee, S. H. *et al.* Effects of intraoperative inhaled iloprost on primary graft  
745 dysfunction after lung transplantation: A retrospective single center study.

- 746 *Med.* **95** (27), (2016).
- 747 40. Gallardo, A. *et al.* The molecular clock protein Bmal1 regulates cell  
748 differentiation in mouse embryonic stem cells. *Life Sci. alliance* **3**, 1–12 (2020).
- 749 41. Almeida, S., Chaves, M. & Delaunay, F. Transcription-based circadian  
750 mechanism controls the duration of molecular clock states in response to  
751 signaling inputs. *J. Theor. Biol.* **484**, 1–11 (2020).
- 752 42. Braghiroli, A. *et al.* Day and night control of copd and role of pharmacotherapy:  
753 A review. *Int. J. COPD* **15**, 1269–1285 (2020).
- 754 43. Zou, X. *et al.* A Systems Biology Approach Identifies Hidden Regulatory  
755 Connections Between the Circadian and Cell-Cycle Checkpoints. *Front.*  
756 *Physiol.* **11**, 1–9 (2020).
- 757 44. Gaucher, J., Montellier, E. & Sassone-Corsi, P. Molecular Cogs: Interplay  
758 between Circadian Clock and Cell Cycle. *Trends Cell Biol.* **28**, 368–379  
759 (2018).
- 760 45. Rahman, I. Antioxidant therapies in COPD. *Int. J. Chron. Obstruct. Pulmon.*  
761 *Dis.* **1**, 15–29 (2006).
- 762 46. Yu, D. *et al.* Rev-erba can regulate the NF- $\kappa$ B/NALP3 pathway to modulate  
763 lipopolysaccharide-induced acute lung injury and inflammation. *Int.*  
764 *Immunopharmacol.* **73**, 312–320 (2019).
- 765 47. Wiman, K. G. & Zhivotovsky, B. Understanding cell cycle and cell death  
766 regulation provides novel weapons against human diseases. *J. Intern. Med.*  
767 **281**, 483–495 (2017).
- 768 48. Maddika, S. *et al.* Cell survival, cell death and cell cycle pathways are  
769 interconnected: Implications for cancer therapy. *Drug Resist. Updat.* **10**, 13–29  
770 (2007).

- 771 49. Padgett, J. & Santos, S. D. M. From clocks to dominoes: lessons on cell cycle  
772 remodelling from embryonic stem cells. *FEBS Lett.* **594**, 2031–2045 (2020).
- 773 50. Farshadi, E., van der Horst, G. T. J. & Chaves, I. Molecular Links between the  
774 Circadian Clock and the Cell Cycle. *J. Mol. Biol.* 3515–3524 (2020).
- 775 51. Zepp, J. A. & Morrissey, E. E. Cellular crosstalk in the development and  
776 regeneration of the respiratory system. *Nat. Rev. Mol. Cell Biol.* **20**, 551–566  
777 (2019).
- 778 52. Almeida, S., Chaves, M. & Delaunay, F. Control of synchronization ratios in  
779 clock/cell cycle coupling by growth factors and glucocorticoids. *R. Soc. Open*  
780 *Sci.* **7**, (2020).
- 781 53. Abraham, U. *et al.* Coupling governs entrainment range of circadian clocks.  
782 *Mol. Syst. Biol.* **6**, 1–13 (2010).
- 783 54. Kistemaker, L. E. M. *et al.* Tiotropium attenuates IL-13-induced goblet cell  
784 metaplasia of human airway epithelial cells. *Thorax* **70**, 668–676 (2015).
- 785 55. Morrow, J. D. *et al.* Functional interactors of three genome-wide association  
786 study genes are differentially expressed in severe chronic obstructive  
787 pulmonary disease lung tissue. *Sci. Rep.* **7**, 1–11 (2017).
- 788 56. Ng-Blichfeldt, J. P. *et al.* Tgf- $\beta$  activation impairs fibroblast ability to support  
789 adult lung epithelial progenitor cell organoid formation. *Am. J. Physiol. - Lung*  
790 *Cell. Mol. Physiol.* **317** (1), L14-L28, (2019).
- 791 57. Torre, D., Lachmann, A. & Ma'ayan, A. BioJupies: Automated Generation of  
792 Interactive Notebooks for RNA-Seq Data Analysis in the Cloud. *Cell Syst.* **7**,  
793 556-561.e3 (2018).
- 794
